# Supplementary material for: Estimation of the height of turbulent mixing layer from data of Doppler lidar measurements using conical scanning by a probe beam
Source: Copernicus journal article supplement (doi:10.5194/amt-2020-259), 2020-09-03
Supplement: Supplementary file [file amt-2020-259-AC4-supplement.pdf]

# Estimation of the height of turbulent mixing layer from data of Doppler lidar measurements using conical scanning by a probe beam

Viktor A. Banakh, Igor N. Smalikho, Andrey V. Falits

V.E. Zuev Institute of Atmospheric Optics SB RAS, Tomsk, Russia

5 *Correspondence to:* V.A. Banakh ([banakh@iao.ru](mailto:banakh@iao.ru))

**Abstract.** A method is proposed for determining the height of the turbulent mixing layer on the basis of the vertical profiles of the dissipation rate of turbulent energy, which is estimated from lidar measurements of the radial wind velocity using conical scanning by a probe beam around the vertical axis. The accuracy of the proposed method is discussed in detail. It is shown that for the estimation of the mixing layer height (MLH) with the acceptable relative error not exceeding 20%, the signal-to-noise ratio should be no less than -16 dB, when the relative error of lidar estimation of the dissipation rate does not exceed 30%. The method was tested in an experiment in which the wind velocity turbulence was estimated in smog conditions due to forest fires in Siberia in 2019. The results of the experiment reveal that the relative error of determination of the MLH time series obtained by this method does not exceed 10% in the period of turbulence development. The estimates of the turbulent mixing layer height by the proposed method are **in qualitative** agreement with the MLH estimated from the distributions of the Richardson number in height and time.

10  
15

## 1 Introduction

The turbulent mixing layer in the lower part of the Earth's atmosphere has an important role in the vertical transport of moisture, small gas constituents, **pollutants, and heat** from the surface to the upper layers of the atmosphere. The turbulent mixing layer height is usually understood to be the thickness of the layer adjacent to the ground, in which incoming substances become completely vertically distributed throughout the layer owing to convection or turbulence for an hour (**Stull,1988; Garratt,1994;** Bonin et al., 2018). It is apparent that the higher the intensity of wind turbulence, the larger the mixing layer thickness.

20

There are different technical facilities that can be used for determining the mixing layer height. Doppler sodars, **radio acoustic** systems, and Doppler lidars are the most suitable for this task, as they allow for meteorological data used for turbulent parameter estimation to be measured in the atmospheric boundary layer (ABL) in real time with the required space and time resolution (Bonin et al., 2018; **Emeis et al., 2008;** Hogan et al., 2009; Tucker et al., 2009; Pichugina and Banta, 2010; Barlow et al., 2011; Helmis et al., 2012; Schween et al., 2014; Vakkari et al., 2015; Huang et al., 2017; Petenko et al., 2019). From the data of lidar measurements, the variance of radial velocity  $\sigma_r^2(h)$ , variances of vertical  $\sigma_w^2(h)$  and

25

horizontal  $\sigma_u^2(h)$  and  $\sigma_v^2(h)$  wind vector components, turbulence kinetic energy (TKE)  $E(h)$ , and turbulent energy dissipation rate  $\varepsilon(h)$  can be estimated at different heights  $h$ .

In Bonin et al., 2018; Hogan et al., 2009; Tucker et al., 2009; Pichugina and Banta, 2010; Barlow et al., 2011; Schween et al., 2014; Vakkari et al., 2015; Huang et al., 2017, the mixing layer height (MLH)  $h_{\text{mix}}$  was determined from the decrease in the variance  $\sigma_\alpha^2(h)$  ( $\alpha = r, w, u, v$ ) with height  $h$  down to some minimum threshold value  $\sigma_\alpha^2(h_{\text{mix}}) = \text{Thr}_\alpha$ , at which the turbulence intensity becomes insufficient for efficient air mixing. The variances and MLH were estimated from pulsed coherent Doppler lidar (PCDL) data through the use of various measurement strategies and data processing algorithms (Bonin et al., 2018; Hogan et al., 2009; Tucker et al., 2009; Pichugina and Banta, 2010; Barlow et al., 2011; Schween et al., 2014; Vakkari et al., 2015; Huang et al., 2017; Manninen et al., 2018): (i) in the fixed strictly vertical direction of the probing beam (vertical stare mode), (ii) by scanning in vertical plane, and (iii) by conical scanning by a beam around the vertical axis at a certain elevation angle  $\varphi$ . In Bonin et al., 2018, the “composite fuzzy logic approach” based on the use of all three measurement geometries was applied to determine  $h_{\text{mix}}$ .

According to analysis (Tucker et al., 2009), lidar measurements of the vertical profile of the variance of vertical velocity  $\sigma_w^2(h)$  in the fixed vertical probing direction provide the best accuracy of estimation of the mixing layer height  $h_{\text{mix}}$ . However, it was shown (Bonin et al., 2018) that this is not always the case. In particular, during the propagation of internal gravity waves (IGWs), this method may significantly overestimate  $h_{\text{mix}}$ , and it becomes necessary to perform high-frequency filtering of the data.

The turbulence energy dissipation rate, as well as variances of the fluctuations of wind vector components, characterizes the turbulence (air mixing) intensity and can also be used for the estimation of MLH  $h_{\text{mix}}$ . This was done for the first time in Vakkari et al., 2015, in which the diurnal profile of MLH  $h_{\text{mix}}(t)$ , where  $t$  is time, was determined from the space-time distributions of the dissipation rate  $\varepsilon(h, t)$ . The dissipation rate  $\varepsilon(h, t)$  was estimated from temporal spectra of the vertical velocity measured by lidar in the fixed strictly vertical direction of the probing beam with the use of the Taylor “frozen turbulence” hypothesis (O’Connor et al., 2010).

A method for estimating the turbulence energy dissipation rate  $\varepsilon(h, t)$  from lidar data obtained with the use of conical scanning by a lidar probing beam around the vertical axis was developed in Banakh and Smalikho, 2013; Smalikho and Banakh, 2017. This measurement geometry does not require invoking the frozen turbulence hypothesis. In contrast to O’Connor et al., 2010, this method (Banakh and Smalikho, 2013; Smalikho and Banakh, 2017) takes into account the spatial averaging of the radial velocity. The algorithm for calculating the error of the lidar estimation of the dissipation rate by this method (Banakh and Smalikho, 2013; Smalikho and Banakh, 2017) can be found in Banakh et al., 2017. It was shown in Smalikho and Banakh, 2017 that, in the case of moderate and strong turbulence and a sufficiently high signal-to-noise ratio  $\text{SNR}(h)$ , the accuracy of lidar estimates of the turbulence energy dissipation rate is, as a rule, markedly higher than the

accuracy of estimation of the variances of different wind vector components from lidar data. The estimate of  $\varepsilon(h)$  remains reliable even during the appearance of IGWs with quite a high amplitude of harmonic oscillations of wind vector components (Banakh and Smalikho, 2018; Banakh et al., 2020).

In this paper, we report the results of estimating the turbulent mixing layer height from measurement data of the pulsed coherent Doppler lidar Stream Line obtained with the use of conically scanning by a probing beam. The mixing layer height  $h_{\text{mix}}(t)$  is determined from the height–temporal distributions of lidar estimates of the turbulence energy dissipation rate. The used data were obtained during smog conditions due to forest fires in Siberia in 2019. In this period the signal-to-noise ratio SNR was abnormally high for micropulse low energy lidars such as Stream Line (pulse energy about  $10 \mu\text{ J}$ ). This gave us the opportunity to obtain vertical profiles of turbulence in the entire mixing layer. In contrast to previous works in this subject, the accuracy of estimation of the turbulent mixing layer height from lidar data is analyzed. The examples of comparison of estimates of the turbulent mixing layer height from the dissipation rate with the height-temporal distributions of the Richardson number are listed in the paper as well.

## 2 Method for determination of the turbulent mixing layer height from PCDL data obtained by conical scanning

It was shown in Smalikho and Banakh, 2017 that PCDL data obtained with the use of conical scanning by a probing beam around the vertical axis under the elevation angle  $\varphi$  could be used to estimate not only wind speed and direction but also space-time distributions of estimates of wind turbulence parameters. These parameters are the dissipation rate  $\varepsilon(h, t)$ , the variance of the radial velocity  $\overline{\sigma_r^2}(h, t)$ , and the integral scale of longitudinal correlation of turbulent fluctuations of radial velocity  $L_v(h, t)$ . If the angle is  $\varphi = 35.3^\circ$ , then, with an allowance made for the relation  $E = (3/2)\overline{\sigma_r^2}$  (Eberhard et al., 1989), two-dimensional TKE distributions  $E(h, t)$  can be assessed as well.

The method for obtaining the time series of the turbulent mixing layer height  $h_{\text{mix}}(t)$  from PCDL data measured by conical scanning by a probing beam consists of the following. A probing beam is rotated around the vertical axis  $z$  at the angle  $\varphi$  to the horizontal with a constant angular rate and the azimuth angle  $\theta$  (the angle between the projection of the beam axis on the horizontal plane and the axis  $x$ ) varying from  $0^\circ$  to  $360^\circ$ . During the scanning, the probing volume moves at the height  $h = R \sin \varphi$  along the circle of the base of the probing cone at a distance  $R$  from the lidar.

After the primary processing of coherently detected echo signals of PCDL, we obtained arrays of estimates of the signal-to-noise ratio  $\text{SNR}(R_k, \theta_m; n)$  and the radial velocity  $V_L(R_k, \theta_m; n)$ . Here, SNR is the ratio of the average heterodyne signal power to the noise power in a 50-MHz bandwidth, and the radial velocity is a projection of the wind vector onto the optical axis of the probing beam. The estimates of SNR and radial velocity  $V_L$  are functions of the distance from the lidar to the center of probing volume  $R_k = R_0 + k\Delta R$ , azimuth angle  $\theta_m = m\Delta\theta$ , and the scan (full azimuth scan of 360 degree at a

certain elevation angle) number  $n$  . Here,  $k = 0, 1, 2, \dots, K - 1$  ;  $\Delta R$  is the range gate length;  $m = 0, 1, 2, \dots, M - 1$  ;  $\Delta\theta = 360/M$  is the resolution in the azimuth angle,  $n = 1, 2, 3, 4, \dots, N$  .

The method (Smalikho and Banakh, 2017) for determining wind turbulence parameters from the array of lidar estimates of the radial velocity obtained with conical scanning is applicable if the probability  $P_b$  of a bad (false) estimate of the radial velocity is close to zero (for example, at  $P_b \leq 10^{-4}$ ). The instrumental error  $\sigma_e$  of a good estimate of the radial velocity (Frehlich and Yadlowsky, 1994; Banakh and Smalikho, 2013) and the probability  $P_b$  depend on the signal-to-noise ratio SNR , which decreases with distance. The smaller the SNR , the larger  $\sigma_e$  and  $P_b$  . Thus, the maximum range for the probing of wind turbulence  $R_{K-1}$  is determined by the value of SNR . The distances  $R_k$  correspond to heights  $h_k = R_k \sin \varphi$  .

On the assumption that the wind is a stationary process (within one hour) and statistically homogeneous along the horizontal (within the circle of the base of the scanning cone), the array  $V_L(R_k, \theta_m; n)$  was used to estimate the vector of the mean wind velocity  $\langle \mathbf{V}(h_k) \rangle = \{ \langle V_z \rangle, \langle V_x \rangle, \langle V_y \rangle \}$ , where  $V_z$  is the vertical component and  $V_x, V_y$  are the horizontal components of the wind vector  $\mathbf{V} = \{V_z, V_x, V_y\}$ , by the sine wave fitting method (Banakh and Smalikho, 2013). Angular brackets indicate the average of an ensemble of realizations. Then, the array of random components of estimates of radial velocities is calculated as

$$V'_L(R_k, \theta_m; n) = V_L(R_k, \theta_m; n) - \mathbf{S}(\theta_m) \langle \mathbf{V}(h_k) \rangle_N, \quad (1)$$

where  $\mathbf{S}(\theta_m) = \{ \sin \varphi, \cos \varphi \cos \theta_m, \cos \varphi \sin \theta_m \}$  is the unit vector along the optical axis of the probing beam, and

$\langle f(n) \rangle_N = \frac{1}{N} \sum_{n'=n-N/2}^{n+N/2-1} f(n+n')$  is the average of  $N$  scans. The averaged (over all azimuth angles  $\theta_m$ ) variance  $\bar{\sigma}_L^2$  and the

azimuthal structure function  $\bar{D}_L(\psi_l)$  of the fluctuations of radial velocity measured by the lidar are calculated from this array for every height  $h_k$  by the following equations:

$$\bar{\sigma}_L^2 = \left\langle \frac{1}{M} \sum_{m=0}^{M-1} [V'_L(R_k, \theta_m; n)]^2 \right\rangle_N, \quad (2)$$

$$\bar{D}_L(\psi_l) = \left\langle \frac{1}{M-l} \sum_{m=0}^{M-l-1} [V'_L(R_k, \theta_m + \psi_l; n) - V'_L(R_k, \theta_m; n)]^2 \right\rangle_N, \quad (3)$$

where  $\psi_l = l\Delta\theta$  and  $l = 1, 2, 3, 4, \dots$  .

According to Smalikho and Banakh, 2017, the turbulence energy dissipation rate  $\varepsilon$  is determined by the azimuthal structure function  $\bar{D}_L(\psi_l)$ , which is calculated from the lidar data measured within the inertial range of turbulence by the following equation:

$$\varepsilon = \left[ \frac{\bar{D}_L(\psi_l) - \bar{D}_L(\psi_1)}{A(l\Delta y_k) - A(\Delta y_k)} \right]^{3/2}, \quad (4)$$

where  $A(y)$  is the theoretically calculated function, the equation for which can be found in (Smalikho and Banakh, 2017),  $\Delta y_k = \Delta \theta R_k \cos \varphi$  ( $\Delta \theta$  is in radians)<sup>11</sup>, and  $l \geq 2$ . Then, the variance of radial velocity fluctuations  $\bar{\sigma}_r^2$  averaged over all azimuth angles  $\theta_m$  is estimated as (Smalikho and Banakh, 2017)

$$\bar{\sigma}_r^2 = \bar{\sigma}_L^2 - \bar{D}_L(\psi_1) / 2 + \varepsilon^{2/3} [F(\Delta y_k) + A(\Delta y_k) / 2]. \quad (5)$$

The function  $F(y)$  in Eq. (5) is defined in Smalikho and Banakh, 2017.

Equations (4) and (5) are used to obtain estimates of  $\bar{\sigma}_r^2$  and  $\varepsilon$  at different heights  $h_k$  and at different instants  $t_{n'} = n'\Delta t$ , where  $n' = 0, 1, 2, \dots, N'$ ,  $\Delta t$  is defined by the duration of the scan  $\Delta t \approx T_{\text{scan}}$ , and  $N'$  depends on the duration of measurements. For 24-hour measurements,  $N'$  can be found from the equation  $N'\Delta t = 24$  h. The mixing layer height  $h_{\text{mix}}$  for every instant  $t_{n'}$  is determined from the vertical profiles of  $\bar{\sigma}_r^2$  or  $\varepsilon$  obtained for this instant at the height, where  $\bar{\sigma}_r^2$  or  $\varepsilon$  decrease with height  $h_k$  down to the corresponding minimum threshold values  $\bar{\sigma}_r^2(h_{\text{mix}}) = Thr_\sigma$  or  $\varepsilon(h_{\text{mix}}) = Thr_\varepsilon$ , at which the turbulence intensity is already insufficient for efficient mixing of air.

The algorithm for the evaluation of the mixing layer height is based on the serial search of values of  $\bar{\sigma}_r^2(h_k)$  or  $\varepsilon(h_k)$  at different heights  $h_k$ , starting from the minimum height  $h_0$  up to the height at which the velocity variance or the dissipation rate decreases to the threshold  $Thr_\sigma$  or  $Thr_\varepsilon$ , respectively. When assessing the time series of the mixing layer height  $h_{\text{mix}}(t_{n'})$  from the height–temporal distributions  $\varepsilon(h_k, t_{n'})$ , we use  $Thr_\varepsilon = 10^{-4} \text{ m}^2/\text{s}^3$ , which corresponds to the lower boundary of moderate turbulence. With weak turbulence  $\varepsilon < 10^{-4} \text{ m}^2/\text{s}^3$ , the turbulent mixing of air may be considered to be insignificant. The same threshold was used in Vakkari et al., 2015.

### 3 Experiment during forest fires in Siberia in 2019

To study the atmospheric boundary layer in the air with intense smoke due to forest fires in Siberia in 2019, we conducted a lidar experiment on the measurement of wind turbulence parameters and determination of diurnal variations of the mixing layer height. Continuous measurements by the Stream Line lidar (Halo Photonics, Brockamin, Worcester, United Kingdom) were carried out from July 20 to 29 of 2019 in the territory of the Basic Experimental Observatory (BEO) of the Institute of Atmospheric Optics SB RAS in Tomsk suburbs (56.481430 N, 85.099624 E). During the experiment, the probing beam was focused to a distance of 500 m. Conical scanning by the probing beam around the vertical axis at the alternating elevation angles  $35.3^\circ$  and  $60^\circ$  was used. For the accumulation of raw lidar data,  $N_a = 7500$  (until 12:30 22 July 2019) and  $N_a =$

3000 (after 12:30 on July 22, 2019) laser shots were used. The pulse repetition frequency was  $f_p = 15$  kHz. Thus, the duration of the measurements of an array of radial velocities  $V_L(R_k, \theta_m; n)$  for each azimuth angle  $\theta_m$  was, respectively,  $\delta t = N_a / f_p = 0.5$  and  $0.2$  s. The time for one scan was  $T_{\text{scan}} = 60$  s. The azimuth resolution was  $\Delta\theta = 360^\circ / M = 3^\circ$ , where  $M = T_{\text{scan}} / \delta t = 120$  is the number of rays per scan at  $N_a = 7500$ , and  $\Delta\theta = 1.2^\circ$ ,  $M = 300$  at  $N_a = 3000$ . The range gate length was  $\Delta R = 18$  m. At the beginning of the experiment, we set the maximum range  $R_{K-1}$  equal to 2100 m (maximum measurement heights  $h_{K-1}$  of 1213 m and 1818 m at elevation angles of  $35.3^\circ$  and  $60^\circ$ , respectively), but after 12:30 on July 22, 2019) the maximum range  $R_{K-1}$  was increased to 3000 m ( $h_{K-1}$  of 1734 m and 2600 m at elevation angles of  $35.3^\circ$  and  $60^\circ$ , respectively).

During the experiment, the optical characteristics of the atmosphere varied considerably. Most of the time, the aerosol backscatter coefficient far exceeded the background level owing to the smog from the forest fires. The signal-to-noise ratio SNR was abnormally high for lidars such as Stream Line (pulse energy about  $10 \mu\text{J}$ ) and achieved 0 dB in the cloudless atmosphere at a height of 500 m when scanning at an elevation angle of  $60^\circ$ . Under these conditions, with the method of filtered sine wave fitting (FSWF) (Smalikho, 2003), we succeeded in retrieving the vertical profiles of wind speed and direction up to a height of 2.6 km. Unfortunately, during the lidar measurements on July 26 and 27, there was a series of technical failures (rather lengthy), which made the obtained data unusable. In the last two days of the experiment, the smog disappeared, and the atmosphere became so clear that the echo from distances exceeding 500 m was very weak:  $\text{SNR} < -15$  dB. Estimates of wind turbulence parameters from the data obtained at this SNR have a relative error exceeding 30% (the method for calculating the error is described in papers by Banakh et al.(2017 and 2020)). In some time intervals, the lidar measurements were carried out under conditions of dense fog or low cloudiness, which were serious obstacles to obtaining information about wind and turbulence in the entire atmospheric boundary layer. Thus, we have data measured by the lidar for 6 days (from 20 to 25 July 2019) and which can be used to determine the heights of the mixing layer.

Each of the obtained arrays of estimates of the signal-to-noise ratio  $\text{SNR}(R_k, \theta_m; n)$  and the radial velocity  $V_L(R_k, \theta_m; n)$  contained two sub-arrays,  $\text{SNR}_i(R_k, \theta_m; n)$  and  $V_{Li}(R_k, \theta_m; n)$ , where the subscript  $i = 1$  corresponds to measurements at the elevation angle  $\varphi = \varphi_1 = 35.3^\circ$  (odd scan numbers  $n$ ), and  $i = 2$  corresponds to measurements at  $\varphi = \varphi_2 = 60^\circ$  (even  $n$ ). The elevation angle  $\varphi$  was alternated for  $\Delta\tau \approx 1.5$  s. The height–temporal distributions of the absolute value of the speed  $U_i(h_{ki}, t_{n'})$  and direction angle  $\theta_{Vi}(h_{ki}, t_{n'})$  of the horizontal wind and the vertical wind velocity  $W_i(h_{ki}, t_{n'})$ , where  $h_{ki} = R_k \sin \varphi_i$ ,  $t_{n'} = t_{0i} + n'2(T_{\text{scan}} + \Delta\tau)$ ,  $n' = 0, 1, 2, \dots$ , were calculated from the arrays  $V_{Li}(R_k, \theta_m; n)$  through the methods of direct and filtered sine wave fitting (Banakh and Smalikho, 2013). The height–temporal distributions of the signal-to-noise ratio  $\text{SNR}_i(h_{ki}, t_{n'})$  for every  $n$ -th scan were found as a result of averaging  $\text{SNR}_i(R_k, \theta_m; n)$  over all the azimuth angles  $\theta_m$ .

## 4 Results of the experiment

First, we will consider the results of lidar measurements in a cloudless atmosphere (at least up to height of 1800 m) and at the highest signal-to-noise ratio. Figure 1 shows the height–temporal distributions  $\text{SNR}_i(h_{ki}, t_{n'})$ ,  $U_i(h_{ki}, t_{n'})$ ,  $\theta_{Vi}(h_{ki}, t_{n'})$ ,

and  $W_i(h_{ki}, t_{n'})$  obtained from measurements on July 21 of 2019. Owing to the smog, the signal-to-noise ratio was high, and at an elevation angle of  $60^\circ$ , it exceeded -10 dB for the entire day in the 1-km atmospheric layer adjacent to the ground. Most of the time, in the layer above 500 m,  $\text{SNR}_1(h) < \text{SNR}_2(h)$  at the same height  $h$  since the echo signal travels a longer distance at smaller elevation angles. The analysis of wind data for this day shows that for the 30-min moving average of lidar estimates of wind velocity vector components, there are practically no differences between  $U_1(h, t)$  and  $U_2(h, t)$  or between  $\theta_{V1}(h, t)$  and  $\theta_{V2}(h, t)$  up to a height of 1200 m.

From the obtained arrays of lidar estimates of the radial velocity  $V_{L1}(R_k, \theta_m; n)$  and  $V_{L2}(R_k, \theta_m; n)$ , the height–temporal distributions of the turbulence energy dissipation rate  $\varepsilon_i(h_{ki}, t_{n'})$  and the variance of radial velocity  $\bar{\sigma}_{ri}^2(h_{ki}, t_{n'})$  up to heights of 1200 m ( $i = 1$ , elevation angle  $\varphi = 35.3^\circ$ ) and 1800 m ( $i = 2$ ,  $\varphi = 60^\circ$ ) were calculated by Eqs. (1)-(5). In the calculations with Eqs. (2) and (3), we took  $N = 15$ . For scanning at two angles at  $T_{\text{scan}} = 60$  s, this corresponds to the approximately 30-min average of measured data. The calculated results are shown in Figs. 2 and 3. The black color in these and subsequent figures represents a lack of data because of their low quality owing to an insufficiently high signal-to-noise ratio (Banakh et al., 2017) or because the parameter under consideration is smaller than the lower boundary shown in the color scale.

A comparison of the data in Figs. 2a and 2b for the lower 1-km layer of the atmosphere demonstrates the closeness of the estimates  $\varepsilon_1(h, t)$  and  $\varepsilon_2(h, t)$  obtained from measurements at different elevation angles, which is in agreement with the results of Banakh and Smalikho, 2019 and confirms the assumption of horizontal homogeneity of the turbulent wind field. The difference in the estimates of the radial velocity  $\bar{\sigma}_{r1}^2(h, t)$  and  $\bar{\sigma}_{r2}^2(h, t)$  measured at different elevation angles is more significant than that for the dissipation rate and is caused by the anisotropy of wind turbulence (Banakh and Smalikho, 2019).

The mixing layer height  $h_{\text{mix}}$  was determined from the obtained height–temporal distributions of  $\varepsilon_i(h_k, t_{n'})$  and  $\bar{\sigma}_{ri}^2(h_k, t_{n'})$  for every instant  $t_{n'}$  with the use of the relations  $\bar{\sigma}_r^2(h_{\text{mix}}) = \text{Thr}_\sigma = 0.1 \text{ m}^2/\text{s}^2$  and  $\varepsilon(h_{\text{mix}}) = \text{Thr}_\varepsilon = 10^{-4} \text{ m}^2/\text{s}^3$ . The maximum height of the estimation of the temporal MLH series was 1.2 km for the measurements at an elevation angle of  $35.3^\circ$  and 1.8 km for the measurements at an angle of  $60^\circ$ . The minimum height was  $h_0 = 60$  m. If the estimates of  $\bar{\sigma}_r^2(h_0, t_{n'})$  or  $\varepsilon(h_0, t_{n'})$  at a height of 60 m were smaller than the corresponding threshold, then we took  $h_{\text{mix}} = h_0 = 60$  m. If the estimates of  $\bar{\sigma}_r^2(h_0, t_{n'})$  or  $\varepsilon(h_0, t_{n'})$  at the maximum height exceeded the threshold, we took  $h_{\text{mix}}$  to be equal to the maximum

height of retrieval of the vertical profiles of turbulence parameters. Further, if the dissipation rate at the minimum height is less than the specified threshold, we did not obtain an estimate of the mixing layer height for such cases.

Figure 4 shows the diurnal time series of  $h_{\text{mix}}(t_n)$  obtained from the height–temporal distributions of the dissipation rate and the variance of radial velocity shown in Figs. 2 and 3. One can see that for the diurnal series of the turbulent mixing layer height retrieved from measurements of the dissipation rate at elevation angles of  $35.3^\circ$  and  $60^\circ$ , we have, with rare exceptions, rather close results. The temporal series  $h_{\text{mix}}(t_n)$  calculated from the variances differ more widely as a result of turbulence anisotropy (Banakh and Smalikho, 2019).

Since the temporal MLH series found from estimates of the dissipation rate at different elevation angles differ insignificantly, for other days of the experiment, we calculated  $h_{\text{mix}}(t_n)$  from the estimates of the dissipation rate obtained by scanning at an elevation angle  $60^\circ$ . The signal-to-noise ratio SNR at heights above 500 m is markedly higher at an elevation angle of  $60^\circ$  than at  $\varphi = 35.3^\circ$  (Figs. 1a and 1e). Thus, measurements at  $60^\circ$  provide an estimation of turbulence intensity at higher levels.

Figure 5 shows the height–temporal distributions over of the signal-to-noise ratio, wind velocity, wind direction angle, and turbulent energy dissipation rate, retrieved from lidar measurements during 6 days of the considered experiment. From the data for the SNR, it can be seen that in the morning hours of July 20, 22, and 25, there was cloudiness at low heights, which rose over time due to convection. During the first 3 days of the experiment, the wind was predominantly north. From 11:00 to 19:00 on July 21, the wind direction changed to the east and there were significant changes in the wind with height, which is apparently the reason for the local minimum of the mixing layer height at about 15:00 (see Figure 4). From about 12:00 on July 23rd to 18:00 on July 24th the wind was predominantly northerly.

Using the data in Figure 5 for the dissipation rate  $\varepsilon(h_k, t_n)$  and the threshold  $\varepsilon(h_{\text{mix}}) = \text{Thr}_\varepsilon = 10^{-4} \text{ m}^2/\text{s}^3$ , we obtained the dependence of the height of the mixing layer on time  $h_{\text{mix}}(t_n)$  during 6 days of the experiment (from 20th to 25th July 2019). The time series  $h_{\text{mix}}(t_n)$  are shown in Figure 6. It follows from Figure 6 that between 12:00 and 18:00 in the daytime, the mixing layer height varied widely: from 400 to 1800 m. From 00:00 to 07:00 in the morning and 21:00 to 24:00 in the evening, when the temperature stratification, according to data of sonic anemometers employed in this experiment, was stable, approximately in half of the cases the MLH was determined, since the values of the dissipation rate at the lowest height ( $h_0 = 60 \text{ m}$ ) were less than the threshold of  $10^{-4} \text{ m}^2/\text{s}^3$ . The choice of the minimum height  $h_0 = 60 \text{ m}$  in the measurements at the elevation angle  $\varphi = 60^\circ$  is explained by the fact that the minimum range of the pulsed coherent Doppler lidar should be no smaller than the two lengths of the probing volume (Smalikho et al., 2015). In our measurements, the Stream Line lidar formed a probing volume with a length of 30 m.

One can see from Figure 6 that on July 20 and 25, the time series of MLH are practically identical during the period from 8:00 to almost 12:00. In both cases, the increase in  $h_{\text{mix}}$  was accompanied by the rise of the cloud base due to convection



(see Figure 5 for SNR). This confirms the correctness of the MLH time series assessment based on height–temporal distributions of the turbulence energy dissipation rate.

The results shown in Figure 6 do not contradict the known experimental data (Tucker et al., 2009; Barlow et al., 2011; Vakkari et al., 2015; Huang et al., 2017; Bonin et al., 2018; Manninen et al., 2018). Nevertheless, we made an attempt to determine the accuracy of the lidar estimate of the mixing layer height for different conditions of this experiment.

## 5 Error of MLH estimation

The accuracy of MLH estimation from the PCDL data obtained with the use of conical scanning is determined by the error of estimation of the turbulence energy dissipation rate in the relatively thin atmospheric layer centered at the height  $h_{\text{mix}}$ . To determine this error, we calculated not only height–temporal distributions of the dissipation rate  $\varepsilon(h_k, t_{n'})$  but also instrumental errors of lidar estimation of the radial velocity  $\sigma_e(h_k, t_{n'})$  by Eq. (23) from Smalikho and Banakh, 2017. Then, the relative errors of lidar estimation of the turbulence energy dissipation rate  $E_\varepsilon(h_k, t_{n'})$  ( $E_\varepsilon = \left[ \langle (\hat{\varepsilon} / \varepsilon - 1)^2 \rangle^{1/2} \times 100\% \right]$ ,  $\hat{\varepsilon}$  is estimate and  $\varepsilon$  is true dissipation rate) were calculated with the use of the distributions of the dissipation rate  $\varepsilon(h_k, t_{n'})$  and the instrumental error  $\sigma_e(h_k, t_{n'})$  by Eqs. (6)-(11) from Banakh et al., 2017, and the time series of this error  $E_\varepsilon(h_{\text{mix}}(t_{n'}))$  at heights  $h_{\text{mix}}(t_{n'})$  were determined.

Figure 7 shows the behavior of the relative error  $E_\varepsilon(h_{\text{mix}}(t_{n'}))$  for the diurnal time series of MLH shown in Figure 6. It follows from Figure 7a that the relative errors  $E_\varepsilon(h_{\text{mix}}(t_{n'}))$  exceed 30% for measurements on July 20 in the period between 00:00 and 06:00. This is explained by the relatively large instrumental error of estimation of the radial velocity due to the low signal-to-noise ratio (SNR < -15 dB, see Figure 5a). On the same day, in the period between 11:00 and 18:00, the signal-to-noise ratio at heights above 1 km did not exceed -10 dB (Figure 5a) and sometimes decreased to the lowest threshold SNR = -16 dB, at which the probability of a bad (false) estimate of the radial velocity  $P_b$  can still be considered close to zero. As a result, the instrumental error of estimation of the radial velocity  $\sigma_e$  is much larger than that at heights below 1 km. As the mixing layer height increases, SNR decreases, and the error  $\sigma_e$  increases too (and vice versa for a decrease in  $h_{\text{mix}}$ ). This explains the initial increase in the relative error of estimation of the dissipation rate  $E_\varepsilon$  and its subsequent decrease in the considered period between 11:00 and 18:00. In the other periods, as can be seen from Figure 7a, the error  $E_\varepsilon$  is about 10%, which provides high accuracy of the determination of the mixing layer height.

On July 21, the signal-to-noise ratio in the 1-km layer adjacent to the Earth's surface was very high most of the time (see Figure 1a or Figure 5a). Correspondingly, the instrumental error of estimation of the radial velocity  $\sigma_e$  within the mixing layer did not exceed 0.1 m/s. Therefore, according to the data in Fig. 11b, the error of estimation of the dissipation rate  $E_\varepsilon(h_{\text{mix}})$  was low (mostly about 10%) and did not exceed 18%.

According to the data in Fig. 7c, the relative error of the dissipation rate estimates obtained from measurements from 00:00 to 18:00 on July 22 does not exceed 25%. This is due to the rather high signal-to-noise ratio at the top of the mixing layer (see Figures 5a and 6c).

On July 23, the signal-to-noise ratio was low. Within the mixing layer,  $SNR \sim -10$  dB at a height of 100 m and  $SNR \sim -15$  dB at a height of 1 km (see Figure 5a). As a result, the relative error  $E_\varepsilon(h_{\text{mix}})$  varied widely from 10% to 30% (mostly larger than 15%), as is indicated by Figure 6d.

Due to the lack of measurement data on July 24 from about 10:00 to 13:30, and very weak turbulence on this day at night and in the evening, we calculated the relative errors in estimating the dissipation rate in a short period of time, as can be seen in Figure 7e.

In the period between 08:00 and 20:40 on July 25, the dissipation rate was determined with very high accuracy. The relative error  $E_\varepsilon(h_{\text{mix}})$  did not exceed 15% (mostly 9%), which is explained by the very high signal-to-noise ratio (see Figure 5a). Despite the fact that the  $SNR$  was also rather high for the rest of the time, the accuracy of the dissipation rate estimation in the periods from 00:00 to 07:00 and from 21:00 to 23:00 on July 25 was low, and the relative error  $E_\varepsilon(h_{\text{mix}})$  exceeded 30%. The reason for this is that the dissipation rate at the height  $h_{\text{mix}} = h_0 = 60$  m during this time, according to Figure 5a, was smaller by approximately an order of magnitude than the threshold value  $Thr_\varepsilon = 10^{-4} \text{ m}^2/\text{s}^3$ .

With the use of the algorithm in Smalikho and Banakh, 2013, we conducted a series of closed numerical experiments on the retrieval of vertical profiles of the turbulence energy dissipation rate  $\varepsilon(h_k)$  from simulated lidar data. The simulation was performed for different values of the signal-to-noise ratio  $SNR$  and the vertical gradient of the dissipation rate  $\gamma = -d\varepsilon/dh > 0$  at the height  $h$ , where the dissipation rate was set equal to  $\varepsilon = 10^{-4} \text{ m}^2/\text{s}^3$ . The turbulent mixing layer height was estimated from the profiles of  $\varepsilon(h_k)$  obtained in the numerical experiments with the use of the threshold  $Thr_\varepsilon = 10^{-4} \text{ m}^2/\text{s}^3$ . The obtained estimates  $\hat{h}_{\text{mix}}$  were compared with the preset values  $h_{\text{mix}}$ . The analysis of results of the numerical experiments shows that the accuracy of estimates  $\hat{h}_{\text{mix}}$  depends significantly not only on  $SNR$  but also on the vertical gradient of the dissipation rate  $\gamma$ . The smaller the value of  $\gamma$  (the slower the decrease in the dissipation rate with height), the larger the error  $\sigma_h = \sqrt{\langle (\hat{h}_{\text{mix}} - h_{\text{mix}})^2 \rangle}$ .

Calculation of the error  $\sigma_h$ , using data of atmospheric experiment, with the algorithm in Smalikho and Banakh, 2013 would require very computationally expensive simulation. The error of MLH estimation was determined in another way. To this end, on the assumption that  $E_\varepsilon(h_k) < 30\%$ , the random estimate of the dissipation rate  $\hat{\varepsilon}(h_k)$  at the height  $h_k$  was taken as

$$\hat{\varepsilon}(h_k) = \varepsilon(h_k) \left[ 1 + \frac{E_\varepsilon(h_k)}{100\%} \xi(h_k) \right], \quad (6)$$

where  $\varepsilon(h_k)$  and  $E_\varepsilon(h_k)$  are respectively the estimate of the dissipation rate and its relative error obtained from the data of the lidar experiment, and  $\xi(h_k)$  is a computer-generated random number from the normal distribution of the probability density function with zero mean  $\langle \xi \rangle = 0$  and unit variance  $\langle \xi^2 \rangle = 1$ . To construct the vertical profile  $\hat{\varepsilon}(h_k)$ , random numbers  $\xi(h_k)$  for different heights  $h_k$  were generated in accordance with the correlation function  $C_\xi(l\Delta h) = \langle \xi(h_{\text{mix}} + l\Delta h/2) \xi(h_{\text{mix}} - l\Delta h/2) \rangle$ , where  $h_{\text{mix}}$  is the turbulent mixing layer height determined from the atmospheric experiment, and  $\Delta h = 15.6$  m is a step in height at  $\Delta R = 18$  m and  $\varphi = 60^\circ$ . The correlation function  $C_\xi(l\Delta h)$  was found from the numerical experiments. For the error  $E_\varepsilon(h_k) < 30\%$  and  $Thr_\varepsilon = 10^{-4} \text{ m}^2/\text{s}^3$ , the correlation function  $C_\xi(l\Delta h)$  weakly depends on SNR and  $h_{\text{mix}}$ , which considerably simplifies the procedure of numerical simulation of  $\hat{\varepsilon}(h_k)$  by Eq. (6).

Let us consider an example of calculating the error in estimating the height of the mixing layer from the lidar data of an atmospheric experiment. Figure 8 shows the altitude profiles of the signal-to-noise ratio, the instrumental error in estimating the radial velocity, the relative error in estimating the rate of dissipation, and the dissipation rate itself. Data taken from lidar measurements from 17:40 to 18:20 on July 20, 2019. It can be seen that in a layer up to 1400 m the signal-to-noise ratio is so high that the instrumental error in estimating the radial velocity and the relative error in estimating the dissipation rate do not exceed 0.3 m/s (Figure 8b) and 30% (Figure 8c), respectively. According to Figure 8d, the point of intersection of the vertical profile  $\varepsilon(h_k)$  of the threshold  $Thr_\varepsilon = 10^{-4} \text{ m}^2/\text{s}^3$  is at a height  $h_{\text{mix}} = 976$  m. At this height, the vertical gradient of the dissipation rate  $\gamma = 2.7 \cdot 10^{-7} \text{ m/s}^3$ .

Figure 9 shows (as red curves) statistically independent random realizations of vertical dissipation rate profiles  $\hat{\varepsilon}(h_k)$  simulated by Eq. (6) using the data in Figures 8c ( $E_\varepsilon(h_k)$ ) and 8d ( $\varepsilon(h_k)$ ). From these red curves we obtained estimates for the height of the mixing layer  $\hat{h}_{\text{mix}}$ . These estimates are given in Figure 8. Using 100,000 independent estimates  $\hat{h}_{\text{mix}}$ , we found that the error in estimating the height of the mixing layer  $\sigma_h = 69$  m.

Figure 10 shows the errors in the estimates of the mixing layer height  $\sigma_h(t_{n'})$  obtained from lidar measurements during 6 days of the experiment (from July 20 to July 25, 2019) under various atmospheric conditions. The figure shows that, depending on the atmospheric conditions (signal-to-noise ratio and the vertical gradient of the dissipation rate), the error in the lidar estimate of the mixing layer height varies from 10 m to 100 m or more. Even with a very high SNR, the error  $\sigma_h(t_{n'})$  can exceed 100 m due to the small value of the vertical gradient of the dissipation rate  $\gamma$  (see, data in Figures 5a, 5d, 6f and 10f for the time interval 19:00 - 20:00 25 July 2019).

Calculations of the relative error  $E_h = (\sigma_h / h_{\text{mix}}) \times 100\%$  of of lidar estimation of the turbulent mixing layer height, carried out using the data in Figures 6 and 10, showed that, with rare exceptions,  $E_h$  does not exceed 30%, and for data measured from 12:00 to 18:00,  $E_h$  varies from 2% to 10%. It should be noted that the relative error  $E_h$  does not exceed 20% if the estimate of the mixing layer height is obtained from measurements with SNR of at least -16 dB.

5

## 6 Comparison with the Richardson number

One of the parameters characterizing the stability of the atmospheric boundary layer is the gradient Richardson number,

$$\text{Ri} = N^2 \left( \frac{\partial U}{\partial h} \right)^{-2}, \quad (7)$$

where

$$N^2 = \frac{g}{T_p} \frac{\partial T_p}{\partial h}, \quad (8)$$

$T_p(h, t) = T(h, t) + \gamma_a h$  is the potential temperature,  $T(h, t)$  is the temperature of the air,  $\gamma_a = 0.0098$  deg/m is the dry-adiabatic gradient, and  $\partial T_p(h, t) / \partial h = \partial T(h, t) / \partial h + \gamma_a$ . The gradient Richardson number can be used to estimate the turbulent mixing layer height (Helmis et al., 2012; Petenko et al., 2019; Gibert et al., 2011).

For additional proof of the suitability of the method for estimating the turbulent mixing layer height from lidar data obtained with the use of conical scanning, we conducted a lidar experiment with concurrent measurement of the temperature. The experiment was conducted from April 8 to May 6 of 2020. The temperature was measured by the MTP-5 microwave temperature profiler (Atmospheric Technology, Dolgoprudnyi, Moscow, Russia). This profiler is widely used in atmospheric research currently. The accuracy of temperature measurement and experience of the use of this device in the atmospheric boundary layer research is discussed in Refs. 51–58 which are cited in Banakh et al., 2020. The temperature profiler and the wind lidar Stream Line were installed on the roof of the Institute of Atmospheric Optics (IAO) building in Tomsk (56.475504 N, 85.048225 E) four kilometers from the Basic Experimental Observatory. The profiler provided measurements of the vertical temperature profiles every 5 min, with a resolution of 25 m for heights from 0 to 100 m and a resolution of 50 m for heights from 100 to 1000 m with respect to the height of its installation. As a result, we obtained the height–temporal distributions of the air temperature  $T(h, t)$ . In calculating the derivative  $\partial T_p(h, t) / \partial h$  and the parameter  $N^2$  (8), we used the temperature measurement data averaged over a 10-min period. Then, the Richardson number Ri was calculated by Eq. (7). The mean horizontal wind velocity  $U$  and its derivative  $\partial U / \partial h$  in Eq. (7) were assessed from the

lidar data averaged, as with the temperature, over a 10-min period (10 scans). The parameters and geometry of the lidar measurements were the same as those in July 2019. The scanning was carried out at an elevation angle of 60°.

In contrast to uniquely high SNR for lidar Stream Line in July 2019, during this experiment the signal-to-noise ratio was rather low. It did not allow us to obtain estimates of the wind velocity with an acceptable error at heights above 800 m - 1 km. The threshold value - 16 dB providing an acceptable error of estimation of the dissipation rate by the method used (Smalikho and Banakh, 2017), the signal-to-noise ratio could take at heights 400-500 m and lower. As a consequence, the relative errors of estimation of the turbulence energy dissipation rate and the turbulent mixing layer height could exceed 30% starting from heights of 400 m and lower. More over, the weather was rainy and snowy during the experiment often and not all the measurement data could be used in processing. Nevertheless, the height-temporal distributions of the dissipation rate obtained in the experiment allowed us to monitor the turbulent mixing layer height by the threshold  $Thr_\epsilon = 10^{-4} \text{ m}^2/\text{s}^3$  in many cases.

Fig. 11 shows the daily height-temporal distributions of the turbulence energy dissipation rate and the Richardson number assessed from the data of wind velocity and temperature measurements on 10, 12, 15, 21, 22, 26, 27 April and 01 May 2020. The distributions illustrate typical stratification regimes which observed in the atmospheric boundary layer during the experiment. White curves in Fig. 11 show the diurnal time series of the turbulent mixing layer height, as estimated from the threshold value  $Thr_\epsilon = 10^{-4} \text{ m}^2/\text{s}^3$  for the turbulence energy dissipation rate. Red curves in Fig. 11 show the diurnal time series of the SNR at the level -16 dB. Black colour on the Richardson number distributions in Fig. 11 shows the zones where  $Ri < 0.5$ .

In estimation of the daily variations of the turbulent mixing layer height from the height-temporal distributions of the Richardson number we based on the following. According to the classification of the atmospheric turbulent regimes based on the Richardson number (Baumert and Peters, 2009; Grachev et al., 2013), the small-scale turbulence becomes weak at gradient Richardson numbers more than 0.5. Therefore, it is natural to believe that the turbulent mixing occurs at the time and heights at which the Richardson number  $Ri < 0.5$ . Thus, the minimum height, above which the Richardson number exceeds 0.5, can be taken as the height of the turbulent mixing layer at the current time.

The height-temporal distribution of the Richardson number on 10 April 2020 shows that the turbulent mixing layer height varied between 200 and 75 m from 00:00 to 08:00, then it has increased to a height of approximately 700 m. After that the MLH first fell down to 350 m and then increased to 600 m. After 20:00 it decreased to 200 m. These variations of the MLH agree with the time series of the turbulent mixing layer height assessed from the dissipation rate and depicted by white curve on the height-temporal distribution of the Richardson number. The relative deviations of the estimates of the MLH calculated based on the dissipation rate from the MLH estimates based on the Richardson number do not exceed 13%, excluding the period between 20:30 and 24:00, when SNR was unacceptably low. Similar conclusion follows from the analysis of the data obtained on 12 April 2020. The relative divergence of the estimates of the MLH calculated from the dissipation rate and calculated from the Richardson number is less than 10%, excluding the period between 15:00 and 20:00, when the estimate

of the MLH from the dissipation rate is biased because of low SNR. The estimates of the MLH based on the dissipation rate did not “notice” weak small scale intermittency of the Richardson number values in the lowest 300 m layer both on 10 and 12 April 2020.

The temporal variations of the MLH estimated from the dissipation rate of turbulence energy reproduce with good accuracy developing of the turbulence in the day time observed from the height-temporal distributions of the Richardson number on 15, 21, 22, 26, and 27 April 2020. For these days the estimates of the MLH based on the dissipation rate differ from the MLH estimates calculated based on the Richardson number not more than by 22%, excluding the period between 19:30 and 24:00 on 15 April, when SNR sharply decreased. On the first of May the MLH estimated from the dissipation rate reproduces the daily variations of the turbulent mixing layer height, as determined by the height-temporal distribution of the Richardson number, with the relative deviations less than 25% excluding two one-hour periods of sudden decrease of SNR after 19:00. The height-temporal areas in night time where the Richardson number less than 0.5, as a rule, coincide with the areas of strong wind. For example, on 10 April 2020 at the heights 150 -450 m between 00:00 and 06:00 wind velocity was 13 – 15 m/s and fell down to 7 m/s after 06:00. On 01 May 2020 at the heights 150 -650 m between 00:00 and 09:00 wind velocity was 14 – 17 m/s and fell down to 10 m/s after 09:00.

Thus from Fig.11 it follows that in the periods for which the SNR provides an acceptable error of estimation of the dissipation rate from lidar data, the estimates of the turbulent mixing layer height from the threshold value of the dissipation rate  $Thr_\varepsilon = 10^{-4} \text{ m}^2/\text{s}^3$  and from the criterion  $Ri < 0.5$  agree with relative deviations not exceeding 25%.

## 7 Summary

In this paper, we propose a method for estimating the turbulent mixing layer height on the basis of the height-temporal distributions of the turbulence energy dissipation rate obtained from PCDL measurement data with conical scanning by a probing beam around the vertical axis. The method was tested in experiments in which the atmospheric boundary layer was investigated during smog conditions due to forest fires in Siberia in 2019.

The optical characteristics of the atmosphere varied significantly during the experiments. Most of the time, the aerosol backscatter coefficient far exceeded the background level because of the smog. Under these conditions, the signal-to-noise ratio SNR was abnormally high for lidars in the class of the Stream Line lidar with a pulse energy of about  $10 \mu \text{ J}$ . As a result, in the experiment, we succeeded in retrieving the vertical profiles of the wind speed and direction up to a height of 2.6 km and wind turbulence parameters up to a height of 1.8 km.

The raw data of the lidar experiments conducted on July 20 - 25 of 2019 were used to find the diurnal time series of MLH under conditions of intense smog from the height-temporal distributions of the dissipation rate with the use of the inequality  $\varepsilon < Thr_\varepsilon = 10^{-4} \text{ m}^2/\text{s}^3$  as a criterion that indicates the absence of turbulent mixing. According to the results obtained, on these days, the MLH was at its maximum between 11:00 and 18:00 LT and varied from 400 to 1800 m, depending on the wind and turbulence intensity. It was shown in the experiment that the estimation of the turbulent mixing layer height from the height-

temporal distributions of the turbulence energy dissipation rate has some advantages in comparison with the estimation from the height–temporal distributions of the variance of radial velocity. Because of the anisotropy of wind turbulence, the variance of radial velocity depends significantly on the elevation angle of the scanning.

5 The accuracy of the method for estimating the turbulent mixing layer height from the lidar data obtained with the use of conical scanning is discussed in detail in this paper. We developed a method for calculating the experimental error of estimation of the turbulent mixing layer height from the height–temporal distributions of the turbulence energy dissipation rate. The analysis of the errors calculated by this method shows that the accuracy of MLH estimation depends decisively on the error of estimation of the dissipation rate and on the vertical gradient of the dissipation rate at heights near the top of the mixing layer. In turn, the accuracy of estimation of the dissipation rate depends strongly on the lidar signal-to-noise ratio  
10 SNR. For the estimation of MLH with the acceptable relative error not exceeding 20%, SNR should be no less than -16 dB, when the relative error of lidar estimation of the dissipation rate does not exceed 30%. With the particular data obtained in the experiments, we demonstrate that the relative error of determination of the MLH time series from lidar measurements of the dissipation rate with the use of conical scanning does not exceed 10% in the period of turbulence development, from 06:00 to 22:00 LT. Most of the time in this period, it is less 5%.

15 To prove the suitability of the method for estimating the turbulent mixing layer height from lidar data obtained with the use of conical scanning, we conducted a lidar experiment with concurrent measurement of the temperature in April - May 2020. From the obtained data, we calculated the height–temporal distributions of the gradient Richardson number and determined the MLH from these distributions. A comparison shows that the estimates of the turbulent mixing layer height from the dissipation rate distributions and from the Richardson number distributions using the criterion  $Ri < 0.5$  are in a  
20 qualitative agreement.

## ACKNOWLEDGMENTS

The authors thank Artem Sherstobitov for helping with data processing. This study was supported by the Russian Science Foundation (Project No. 19-17-00170).

## References

- 25 Banakh, V. and Smalikho, I.: Coherent Doppler Wind Lidars in a Turbulent Atmosphere, Artech House Publishers, ISBN-13: 978-1-60807-667-3, 2013.
- Banakh, V. A., Smalikho, I. N., and Falits, V. A.: Estimation of the turbulence energy dissipation rate in the atmospheric boundary layer from measurements of the radial wind velocity by micropulse coherent Doppler lidar, *Opt. Express*, 25, 22679-22692, 2017.
- 30 Banakh, V. A., and Smalikho, I. N.: Lidar studies of wind turbulence in the stable atmospheric boundary layer, *Rem. Sens.*, 10, 1219, 2018.

- Banakh, V. A., and Smalikho, I. N.: Lidar estimates of the anisotropy of wind turbulence in a stable atmospheric boundary layer, *Rem. Sens.*, 11, 2115, DOI: 10.3390/rs11182115, 2019.
- Banakh, V. A., Smalikho, I. N., and Falits, A. V.: Wind–Temperature Regime and Wind Turbulence in a Stable Boundary Layer of the Atmosphere: Case Study, *Rem. Sens.*, 12, 955, 2020.
- 5 Barlow, J. F., Dunbar, T. M., Nemitz, E. G., Wood, C. R., Gallagher, M. W., Davies, F., O'Connor, E., Harrison, R. M.: Boundary layer dynamics over London, UK, as observed using Doppler lidar during REPARTEE-II, *Atmos. Chem. and Phys.*, 11, 2111–2125, 2011.
- Baumert, H. Z, and Peters, H.: Turbulence closure: turbulence, waves and the wave-turbulence transition – Part1: Vanishing mean shear, *Ocean Sci.*, 5, 47–58, 2009.
- 10 Bonin, T. A., Carroll, B. J., Hardesty, R. M., Brewer, W. A., Hajny, K., Salmon, O. E., and Shepson, P. B.: Doppler lidar observation of the mixing height in Indianapolis using an automated composite fuzzy logic approach, *Journ. of Atmos. and Ocean. Techn.*, 35, 915-935, 2018.
- Eberhard, W. L., Cupp, R. E., and Healy, K. R.: Doppler lidar measurement of profiles of turbulence and momentum flux, *Journ. of Atmos. and Ocean. Techn.*, 6, 809-819, 1989.
- 15 Emeis, S., Schafer, K., and Munkel, C.: Surface-based remote sensing of the mixing-layer height - a review, *Meteorologische Zeitschrift*, 17, 621-630, 2008.
- Frehlich, R. G., and Yadlowsky, M. J.: Performance of mean-frequency estimators for Doppler radar and lidar, *Journ. of Atmos. and Ocean. Techn.*, 11, 1217-1230, 1994.
- Garratt, J. R.: *The atmospheric boundary layer, Cambridge atmospheric and space science series, Cambridge University Press, Cambridge, 1994.*
- 20 Gibert, F., Arnault, N., Cuesta, J., Plougonven, R., and Flamant, P.H.: Internal gravity waves convectively forced in the atmospheric residual layer during the morning transition, *Q. J. R. Meteorol. Soc.*, 137, 1610-1624, 2011.
- Grachev, A. A., Andreas, E. L., Fairall, Ch. W., Guest, P. S., Ola, P., and Persson, G.: The Critical Richardson Number and Limits of Applicability of Local Similarity Theory in the Stable Boundary Layer, *Bound.-Lay. Meteorol.*, 147, 51–82. DOI 10.1007/s10546-012-9771-0, 2013.
- 25 Helmis, C. G., Sgouros, G., Tombrou, M., Schäfer, K., Münkel, C., Bossioli, E., and Dandou, A.: A Comparative Study and Evaluation of Mixing-Height Estimation Based on Sodar-RASS, Ceilometer Data and Numerical Model Simulations, *Bound.-Lay. Meteorol.*, 145, 507–526, doi:10.1007/s10546-012-9743-4, 2012.
- Hogan, R. J., Grant, A. L. M., Illingworth, A J., Pearson, G. N., and O'Connor E.J.: Vertical velocity variance and skewness in clear and cloud-topped boundary layers as revealed by Doppler lidar, *Quarterly Journ. of the Royal Meteorol. Soc.*, 135, 635–643, 2009.
- 30 Huang, M., Gao, Z., Miao, S., Chen, F., Lemone, M. A., Li, J., Hu, F., and Wang L.: Estimate of boundary-layer depth over Beijing, China, using Doppler lidar data during SURF-2015, *Bound.-Lay. Meteorol.*, 162, 503-522, 2017.



Manninen, A., Marke, T., Tuononen, M., and O'Connor, E.: Atmospheric boundary layer classification with Doppler lidar, *J. Geophys. Res.*, 123, 8172-8189, 2018.

O'Connor, E. J., Illingworth, A. J., Brooks, I. M., Westbrook, C. D., Hogan, R. J., Davies, F., and Brooks, B. J.: A method for estimating the kinetic energy dissipation rate from a vertically pointing Doppler lidar, and independent evaluation from balloon-borne in situ measurements, *Journal of Atmos. and Ocean. Tech.*, 27, 1652-1664, 2010.

Petenko, I., Argentini, S., Casasanta, G., Genthon, C., and Kallistratova, M.: Stable Surface-Based Turbulent Layer During the Polar Winter at Dome C, Antarctica: Sodar and In Situ Observations. *Bound. Layer Meteorol.*, 171, 101–128, doi:10.1007/s10546-018-0419-6, 2019.

Pichugina, Y. L., and Banta, R. M.: Stable boundary layer depth from high-resolution measurements of the mean wind profile, *Journ. of Appl. Meteorol. and Climatol.*, 49, 20-35, 2010.

Schween, J. H., Hirsikko, A., Löhnert, U., and Crewell, S.: Mixing-layer height retrieval with ceilometer and Doppler lidar: from case studies to long-term assessment, *Atmos. Meas. Tech.*, 7, 3685-3704, 2014.

Smalikho, I. N.: Techniques of wind vector estimation from data measured with a scanning coherent Doppler lidar, *Journ. of Atmos. and Ocean. Techn.*, 20, 276-291, 2003.

Smalikho, I. N., and Banakh, V. A.: Accuracy of Estimation of the Turbulent Energy Dissipation Rate from Wind Measurements with a Conically Scanning Pulsed Coherent Doppler Lidar. Part I. Algorithm of Data Processing, *Atmos. and Ocean. Opt.*, 26, 404–410, 2013.

Smalikho, I. N., Banakh, V. A., Holzäpfel, F., and Rahm, S.: Method of radial velocities for the estimation of aircraft wake vortex parameters from data measured by coherent Doppler lidar, *Opt. Express*, 23, A1194-A1207, 2015.

Smalikho, I. N., and Banakh, V. A.: Measurements of wind turbulence parameters by a conically scanning coherent Doppler lidar in the atmospheric boundary layer, *Atmos. Meas. Tech.*, 10, 4191–4208, 2017.

Stull, R. B.: *An introduction to boundary layer meteorology*, Kluwer Academic Publishers, Dordrecht, The Netherlands, 1988.

Tucker, S. C., Brewer, W. A., Banta, R. M., Senff, C. J., Sandberg, S. P., Law, D. C., Weickmann, A. M., and Hardesty, R. M.: Doppler lidar estimation of mixing height using turbulence, shear, and aerosol profiles, *Journ. of Atmos. and Ocean. Techn.*, 26, 673-688, 2009.

Vakkari, V., O'Connor, E. J., Nisantzi, A., Mamouri, R. E., and Hadjimitsis, D. G.: Low-level mixing height detection in coastal locations with a scanning Doppler lidar, *Atmos Meas. Tech.*, 8,1875-1885, 2015.

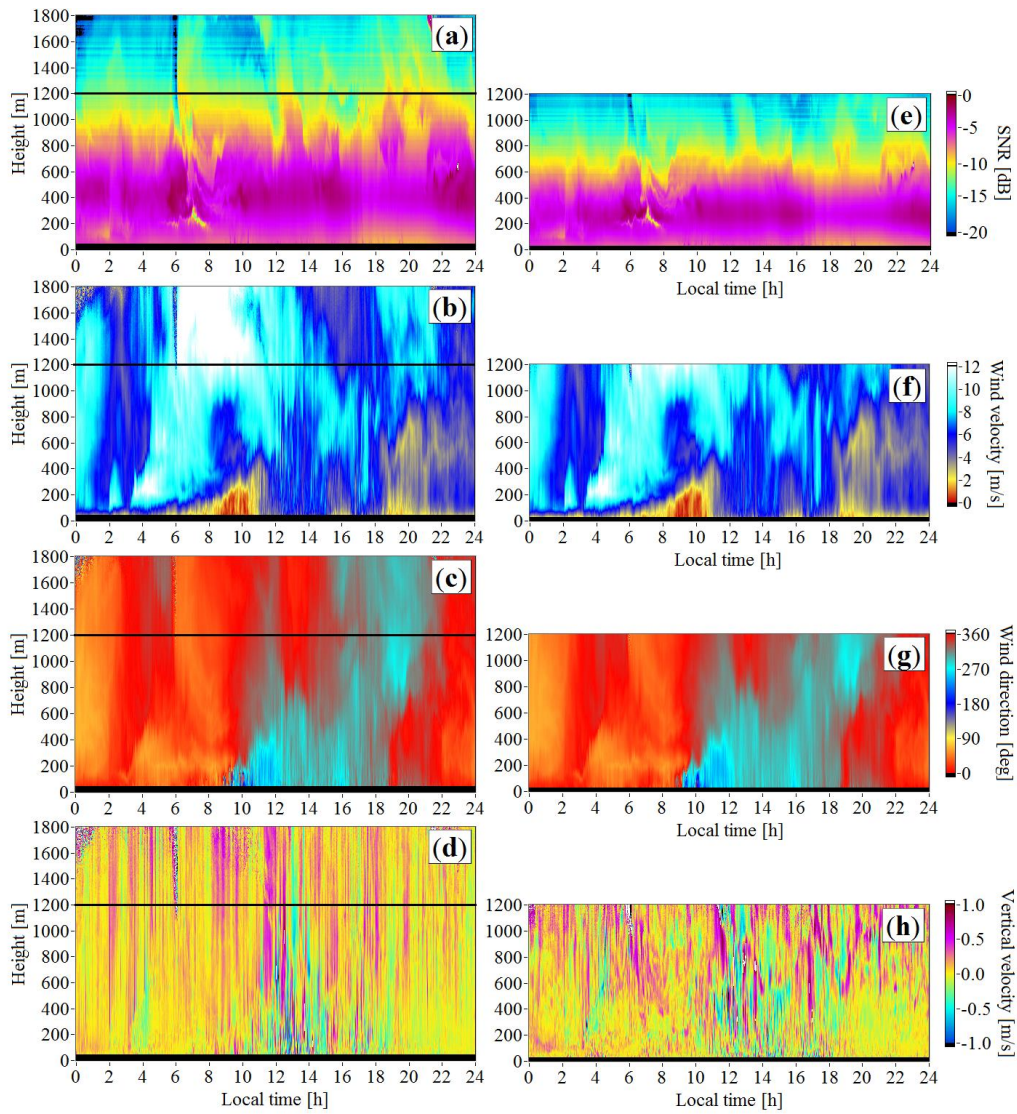

**Figure 1:** Height–temporal distributions of the signal-to-noise ratio (a, e), wind speed (b, f), wind direction angle (c, g), and vertical component of the wind vector (d, h) for elevation angles of  $60^\circ$  (a-d) and  $35.3^\circ$  (e-h) on July 21 of 2019.

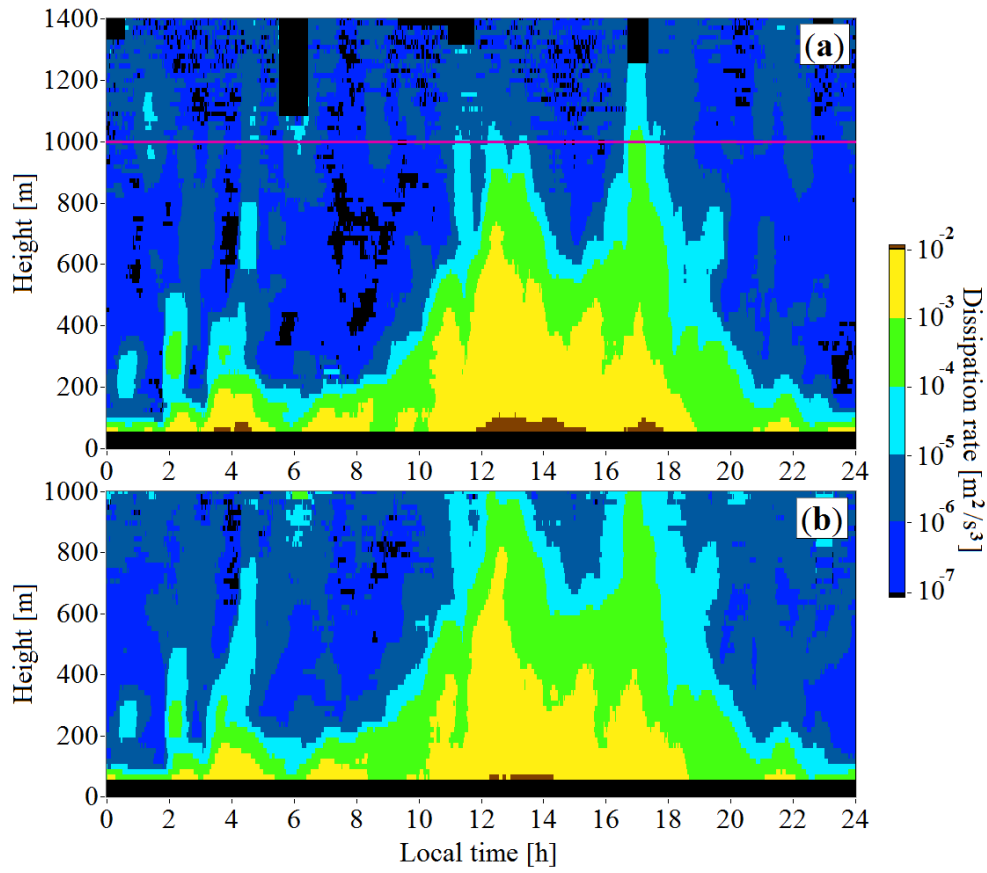

5

**Figure 2:** Height and time distributions of the turbulence energy dissipation rate at elevation angles of  $60^\circ$  (a) and  $35.3^\circ$  (b). Measurements were taken on July 21 of 2019.

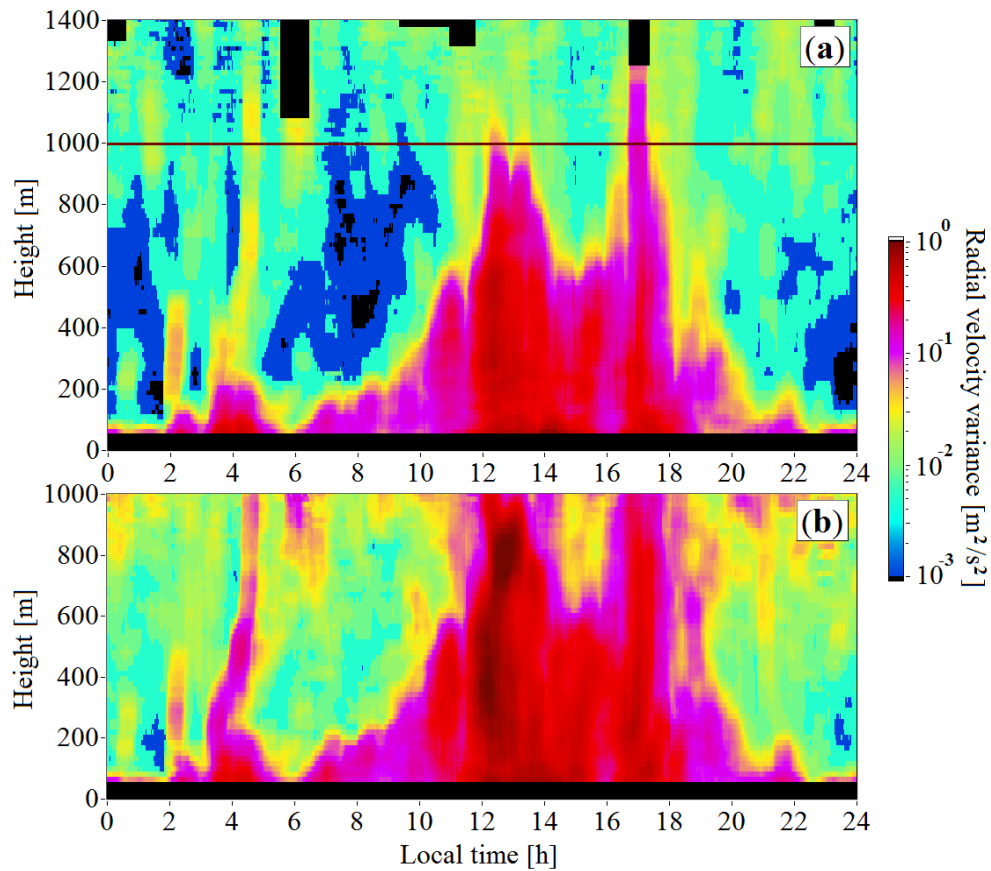

5 **Figure 3:** Height and time distributions of the variance of radial velocity at elevation angles of 60° (a) and 35.3° (b). Measurements were taken on July 21 of 2019.

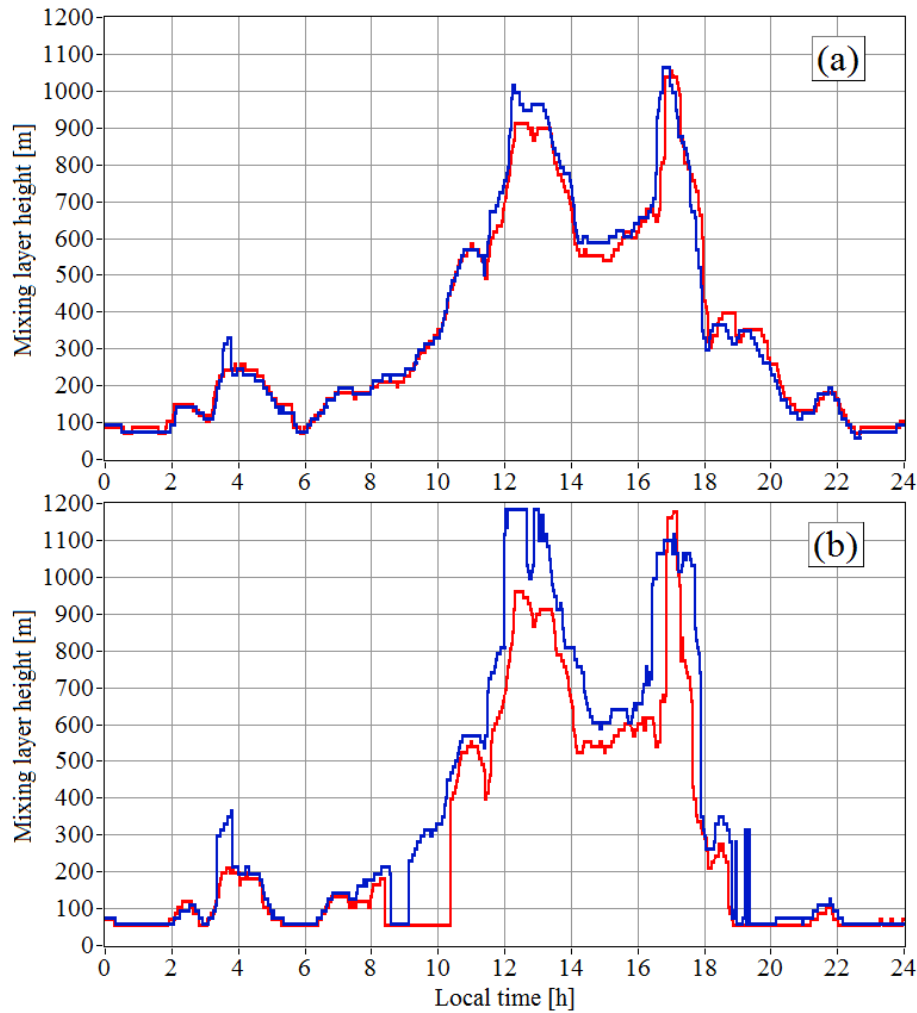

5 **Figure 4:** Temporal series of the turbulent mixing layer height (thickness) obtained from spatiotemporal distributions of the turbulence energy dissipation rate (a) and the variance of radial velocity (b). Scanning at elevation angles of  $60^\circ$  (red curves) and  $35.3^\circ$  (blue curves). Measurements were taken on July 21 of 2019. The data of Figs. 2 and 3 are used.

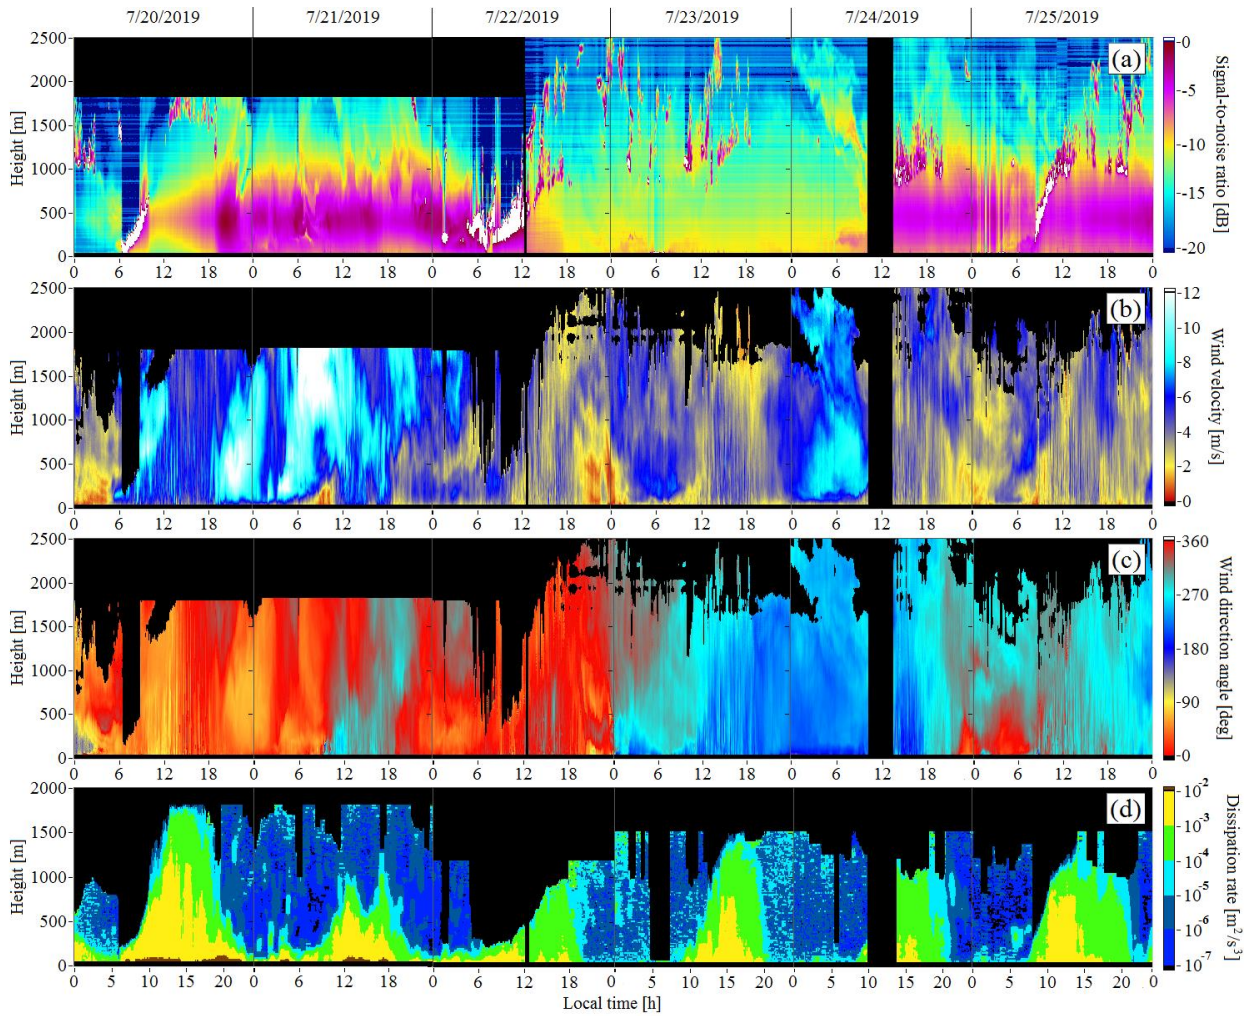

5 **Figure 5:** Height and time distributions of SNR (a), wind velocity (b), wind direction angle (c), and turbulent energy dissipation rate (d) retrieved from Stream Line lidar measurements at elevation angles of 60°.



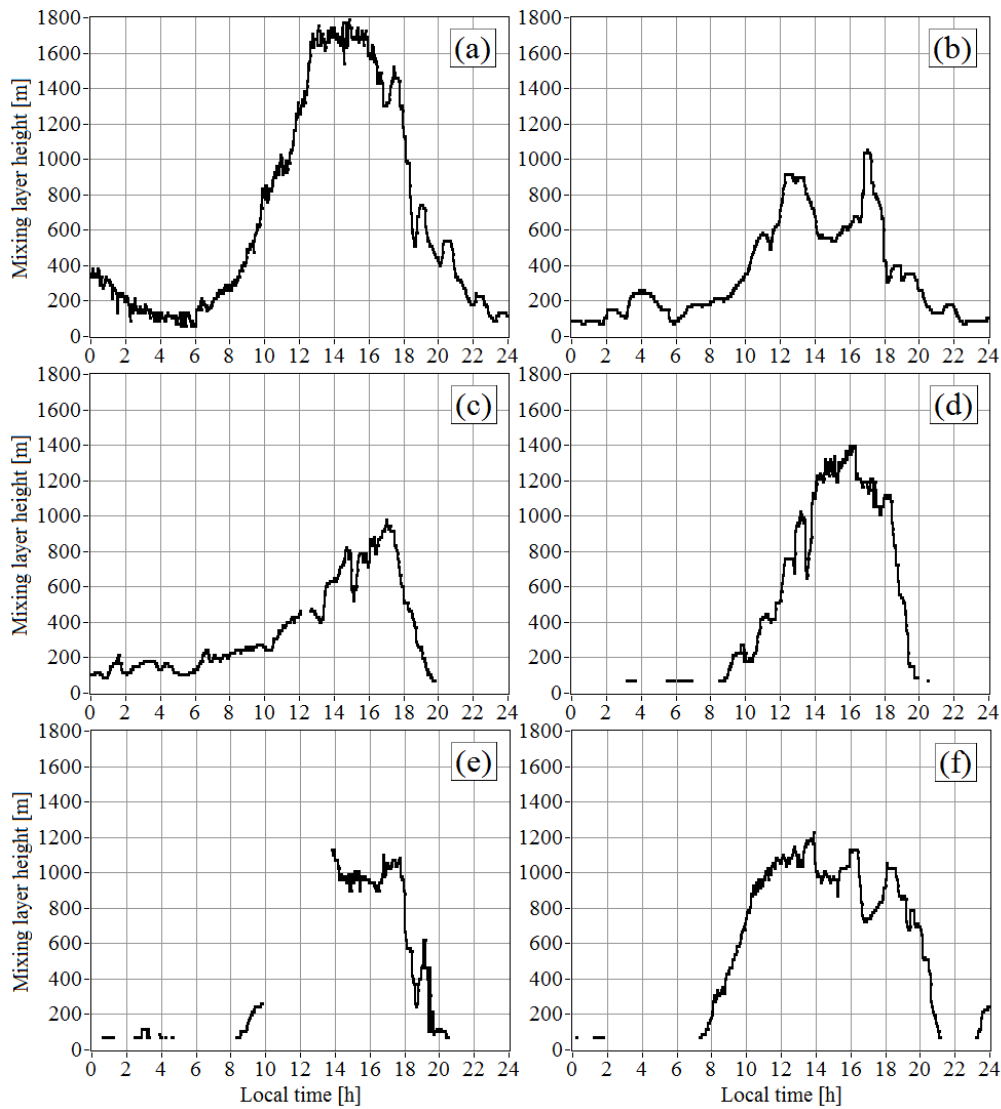

**Figure 6:** Time series of the turbulent mixing layer height (thickness) obtained from lidar data on July 20 (a), 21 (b), 22 (c), 23 (d), 24 (e), and 25 (f) of 2019.

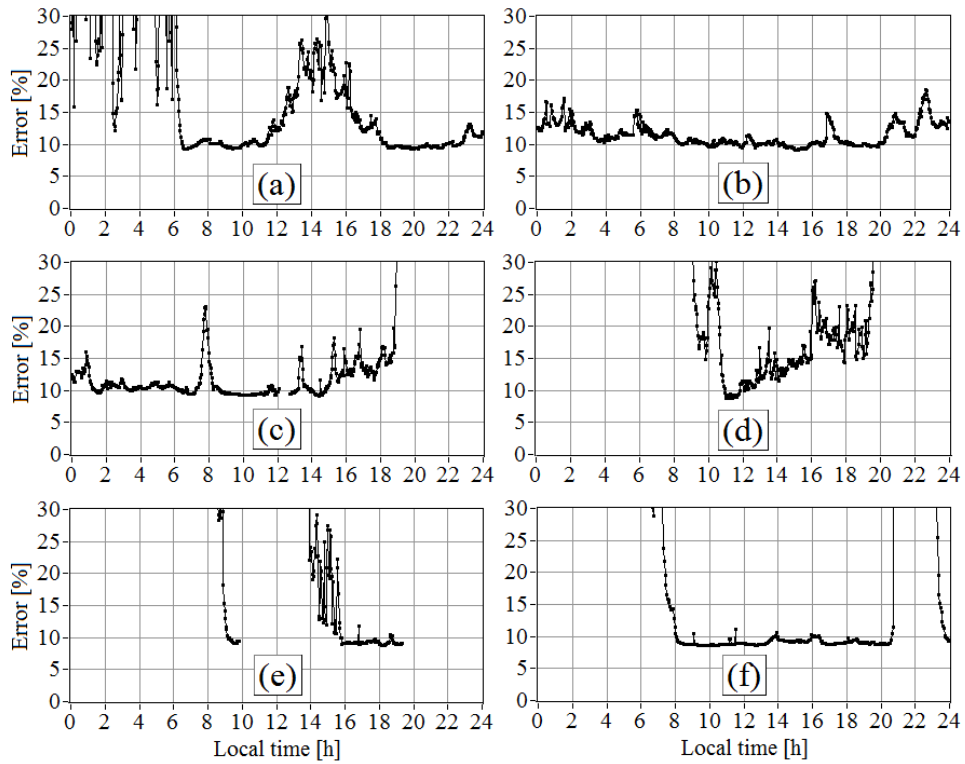

5 **Figure 7:** Relative error of estimation of the turbulent energy dissipation rate at the mixing layer heights determined from measurements on July 20 (a), 21 (b), 22 (c), 23 (d), 24 (e), and 25 (f) of 2019.



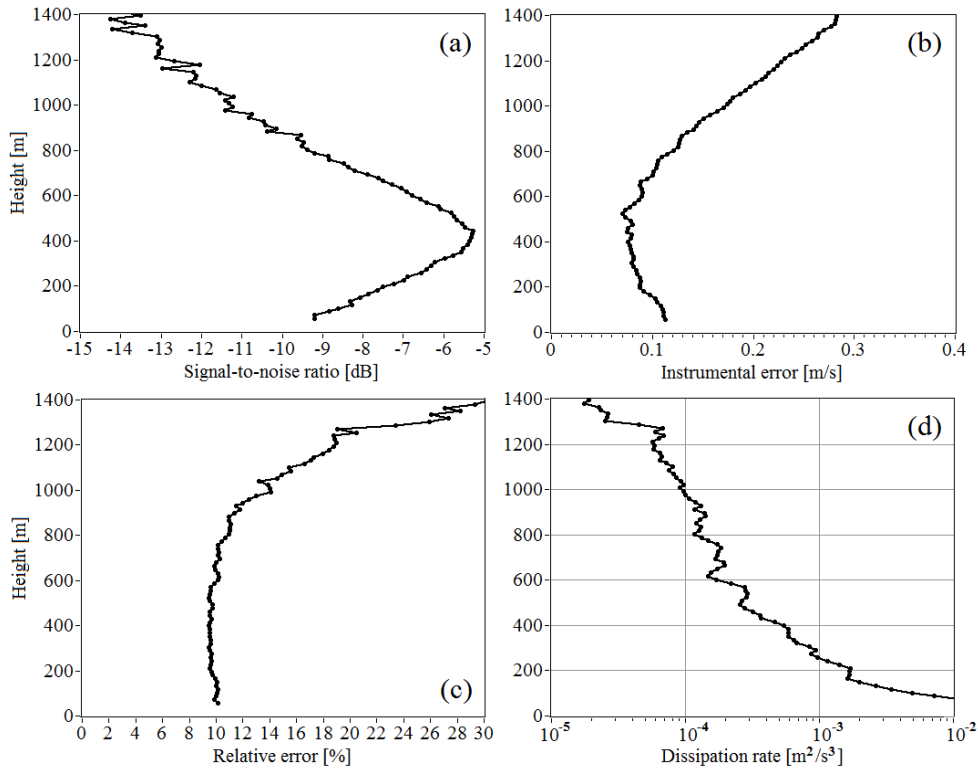

5 **Figure 8:** Vertical profiles of signal-to-noise ratio (a), instrumental error of radial velocity estimate (b), relative error of estimation of the turbulent energy dissipation rate (c), and turbulent energy dissipation rate (d) retrieved from measurements from 17:40 to 18:20 on July 20, 2019.

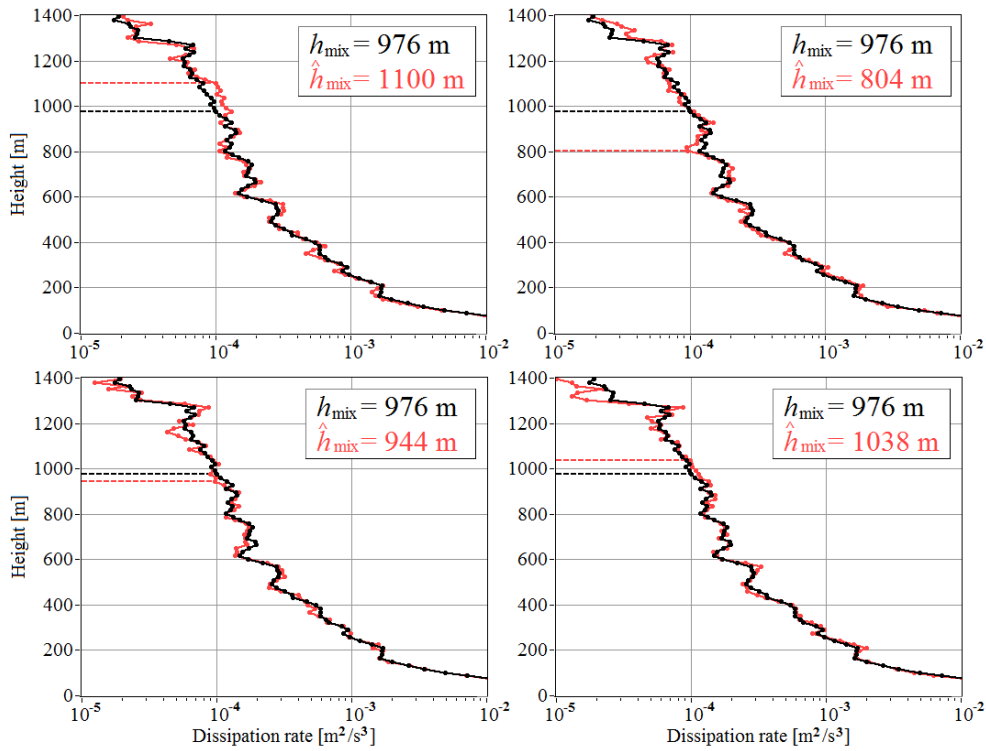

**Figure 9:** Measured (black curve taken from Figure 7d) and simulated (red curves obtained with the use Eq.(6) and data of Figures 7c and 7d) vertical profiles of the turbulent energy dissipation rate.

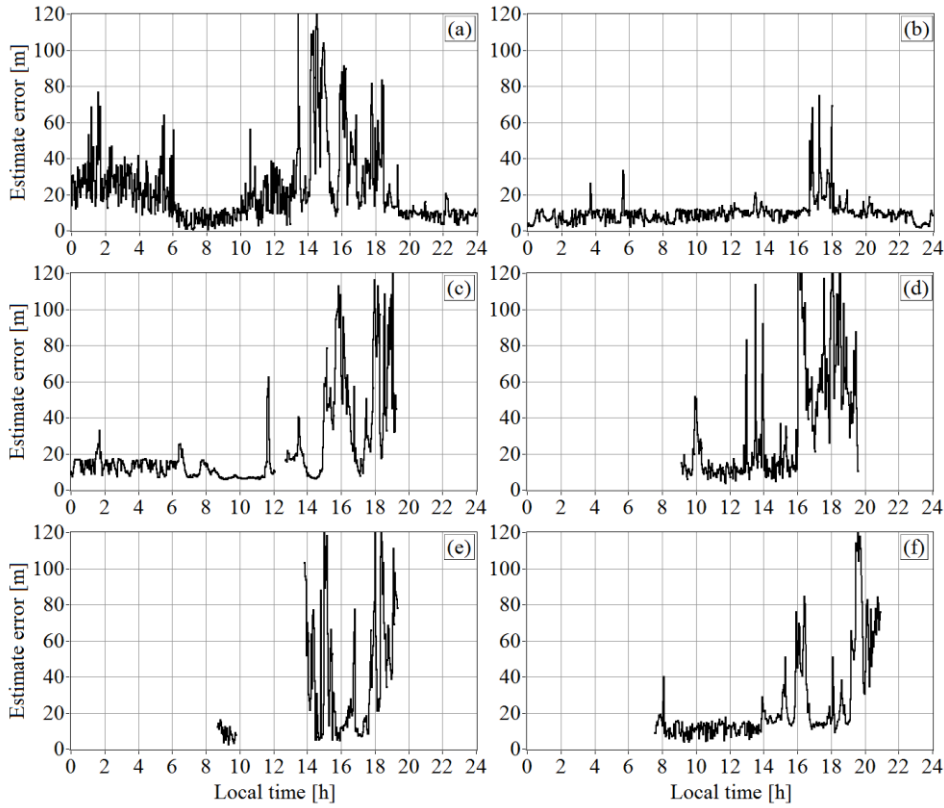

5 **Figure 10:** Error of estimation of the mixing layer heights determined from measurements on July 20 (a), 21 (b), 22 (c), 23 (d), 24 (e), and 25 (f) of 2019.

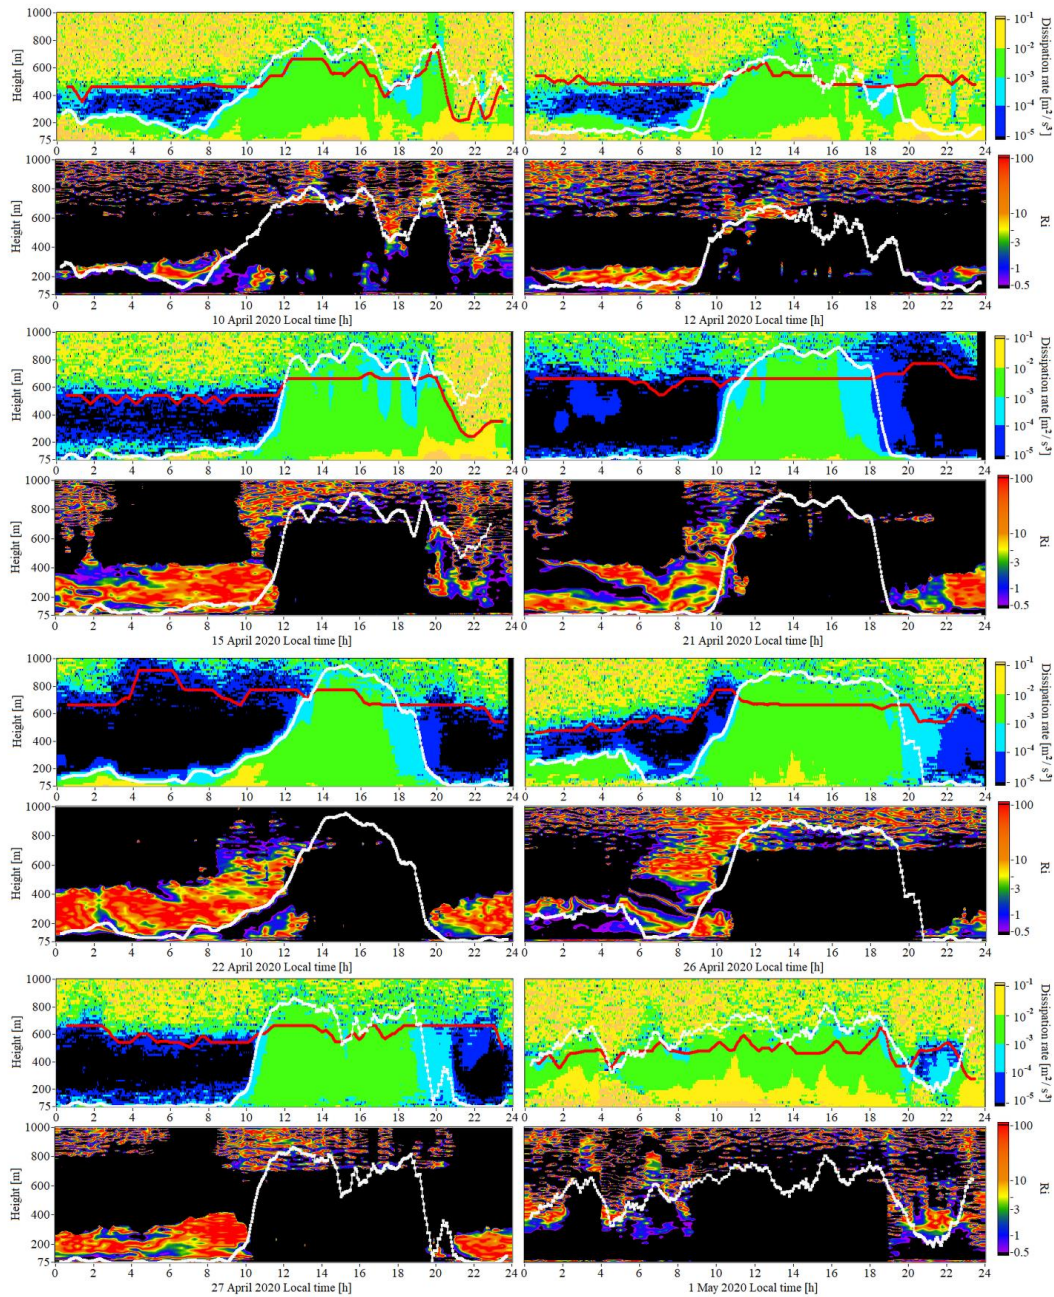

**Figure 11:** Height–temporal distributions of the turbulence energy dissipation rate (a) and the Richardson number as obtained from measurements on April 10, 12, 15, 21, 22, 26, 27 and on May 1 of 2020. White curves reproduce the diurnal time series of the turbulent mixing layer height, as estimated from the turbulence energy dissipation rate, Red curves show the diurnal time series of the SNR at the level -16 dB. Black colour on the Richardson number distributions shows the zones where  $Ri < 0.5$ .

## Reply to the Reviewers of the manuscript

5 We thank very much the Reviewers for their time and efforts, thoughtful and very useful comments. We have incorporated the most of their suggested revisions as indicated below. Changes and additions in the revised manuscript are marked by yellow.

### Reviewer 1

10 This manuscript presents the method for determining the MLH using the dissipation rate of turbulent energy estimated from scanning lidar measurements. The application and accuracy of the method are demonstrated in an experiment in which the wind velocity turbulence was estimated in smog conditions due to forest fires in Siberia in 2019. The results are also validated by comparing to that retrieved from the radial velocity variance and the Richardson number.

15 The method is useful in mixing layer research. The accuracy of the method is discussed and the analysis is careful. The manuscript is recommended to be published on AMT after major revision, as below:  
1. In Sec.3, The details of the turbulence energy dissipation rate could be more briefly.

20 Fixed. Figs. 4, 5 of the initial version of the manuscript are removed as well as comments to these Figures. Since Section 3 describes the experiment, we have changed the title of this section "Evaluation of the turbulent mixing layer height during forest fires in Siberia in 2019" to "Experiment during forest fires in Siberia in 2019".

25 2. In page 6 line19. The turbulence intensity decreases during 14:00-16:00, as show in Fig. 2 and Fig. 3. The corresponding MLH is obvious low during this period, as show Fig. 6. This may be caused by temperature or the cloud out of detection of lidar. I would recommend removing "On this day, there were no clouds" or add a discussion.

Page 7, lines 1-2: The sentence "First, we will consider the results of lidar measurements in a cloudless atmosphere (at least up to height of 1800 m) and at the highest signal-to-noise ratio" has been added. In the same paragraph, the sentence " On this day, there were no clouds, and the smog was observed from 00:00 to 24:00 Local Time up to a height of at least 2 km." is deleted.

30 We assume that the decrease in the turbulence intensity during 14:00-16:00 is caused by a rapid change in wind direction (see Figure 1c) during that period. At least the dependence of the height of the turbulent mixing layer, shown in Figure 4a, is in agreement with the changes in the height profiles of the wind direction angle in the time period from 10:00 to 19:00.

35 3. In page 14, line 26. I would suggest pasting the details of the corresponding cases, such as SNR, vertical profiles and turbulence intensity, in Appendix. The result of  $35.3^\circ$  is recommended to extend to 1.8 km with data quality control.

We cannot increase the maximum height to 1800 m when measuring at an elevation angle of  $35.3^\circ$ , since during the experiment we set the maximum range of 2100 m (3000 m).

40 Page 6, lines 5-8: The sentence "At the beginning of the experiment, we set the maximum ... at elevation angles of  $35.3^\circ$  and  $60^\circ$ , respectively." has been added.

4. In page 7, line 4 and line11. "Figs. 2(a) and 2(b)" should be "Figs. 2a and 2b", to keep the format consistent.

Fixed.

5. The journal title abbreviation should be checked, such as in page 17 line 18, "Opt. Expr.", in page 16 line 25, "Boundary-Layer Meteorol".

Fixed.

5 6. Page 1, line 23. "radioacoustic" should be "radio acoustic".

Fixed.

7. Page 3, line 28. "depend" should be "depends".

The instrumental error and the probability depend on SNR ...

8. Page 14, line 20-22. Page 15, line 4-7. The descriptions are repetitive.

10 The sentence "The experiments were carried out in the territory of the Basic Experimental Observatory of the Institute of Atmospheric Optics in Tomsk with the use of the Stream Line lidar (Halo Photonics, Brockham, Worcester, United Kingdom)." and the text "On July 20 and 25, the time series of MLH are practically identical during the period from 8:00 to almost 12:00. In both cases, MLH was increasing in this period, and its increase was accompanied by the rise of the cloud base due to convection. This confirms the correctness of the MLH time series assessment based on the height-temporal distributions of the turbulence energy dissipation rate." have been removed.

15 9. Page 18-20, figure 1-3. The results are both on July 21 of 2019. Suggest plotting in one figure for finding some relationships.

20 We think that combining Figures 1-3 into one figure will be inconvenient for the reader of this paper. Too much information for one figure.

10. Page 25-26, figure 8-9. The two cases are partly cloudy as well as figure 7. Some descriptions about the three cases are repetitive. Also, the two cases are not used for analyzing the relative error of the MLH. What role of the two cases in this manuscript? I would suggest moving to the Appendix.

25 We removed Figures 8 and 9 (figure numbering in the original version of the manuscript), but added Figure 5 (figure numbering in the revised manuscript), where there is information about the signal-to-noise ratio, wind and dissipation rate for 6 days of the experiment.

11. Page 31-32, figure 14-15. The results are both on May 1 of 2020. Suggest plotting in one figure for intercomparing. The data between 800-1000m seems noisy. Do you have data quality control of the raw data? Which line represents the MLH retrieved from the Richardson number in figure 15?

30 Text on 13 and 14 pages of the initial version of the manuscript is changed (13, 14 pages of the revised manuscript). We added new data and replaced Figs. 14, 15 (initial version) by Fig.11 (revised version) where the dissipation rate and the Richardson number are plotting together. In the height-temporal distributions of the Richardson number as a height of the turbulent mixing layer we took a minimal height above which the Richardson number exceeds 0.5. (Lines 23, 24 on 13 page of the revised manuscript). Yes, we did quality control of the raw data (Lines 3-8 on 13 page of the revised manuscript).

## Reviewer 2

40 Review of 'Estimation of the height of turbulent mixing layer from



data of Doppler lidar measurements using conical scanning by a  
probe beam' by Banakh et al.

September 28, 2020

The study proposes a method for the determination of the mixing layer height based on profiles of  
5 dissipation rate estimated from scanning Doppler lidar measurements. The authors analyze several days  
from a period with smog related to forest fires. They give estimates of the uncertainty of the method and  
find that the relative error of the mixing layer height is less than 20 % when the signal-to-noise ratio is  
high enough and turbulence is sufficiently strong. Finally, the authors compare the mixing layer height  
to the Gradient Richardson number determined from Doppler lidar and microwave radiometer.

10 The determination of mixing layer height from dissipation rate itself is not new and has been  
published in other studies (e.g. Vakkari et al., 2015; Manninen et al., 2018), but the method described  
here is based on an estimation of dissipation rate developed by the same authors which has not been  
used to estimate mixing layer heights so far. In addition with the error estimate of mixing layer height  
this makes an interesting study. However, I have a major concern about the representativity and  
15 significance of the conclusions the authors draw. The conclusions are based on very few days only (4  
days for the mixing layer height estimate, 2 days for the error estimate and 1 day for the comparison  
with temperature profiles). The authors mention that data are available for 10 days during a period with  
forest fires in 2019 and for nearly one month in spring 2020 and I wonder why they do not include data  
from all available days in their analysis. In my opinion, the results would be much more significant and  
20 relevant for the community if they were based on longer time periods and obtained in a objective and  
statistical way. The statement "It is shown that for the estimation of the mixing layer height (MLH) with  
the acceptable relative error not exceeding 20 %, the 10 signal-to-noise ratio should be no less than -16  
dB, when the relative error of lidar estimation of the dissipation rate does not exceed 30%." is based on  
manual and subjective analysis of the individual days at least this is the way it is presented in the  
25 manuscript. Besides this major concern, I have several other comments given below.

Based on my evaluation, I cannot recommend the manuscript for publication in AMT in its  
present state. However, I believe that the study could be suitable for publication, if the authors provided  
a major revision in which they base their conclusions on an objective and statistical analysis including  
all available days.

30 From lidar measurements during the 10-day experiment, data obtained only within 6 days proved  
to be suitable. Perhaps this amount of data is not enough for full-fledged statistics, but our main goal  
was to test the proposed method for determining the height of the mixing layer from the vertical profiles  
of the turbulent energy dissipation rate, retrieved from measurements by the Stream Line lidar with  
conical scanning, for which the pulse energy is rather low. Due to the low pulse energy under normal  
35 conditions, it is possible to retrieve the vertical profiles of wind turbulence parameters (including the  
dissipation rate) from measurements with this lidar to a maximum height of 500 m, which is not enough  
to obtain the dependence of the mixing layer height for a full day. From 20 to 27 July 2019, there was  
smog at the site of the experiment due to forest fires in Siberia and this gave us the opportunity to obtain  
vertical profiles of turbulence in the entire mixing layer. The method described here can be applied to  
40 data measured by a high-power pulsed coherent Doppler lidar under normal conditions (with a  
background aerosol), which will enable a full-fledged statistical analysis.

We do not fully agree with the Reviewer's criticism of the main conclusions of this work, since they are based on reliable experimental results, despite the relatively small amount of data measured by the lidar. Nevertheless, under revising the manuscript, we extended the experimental data which are considered and analyzed, and tried to take into account comments from the Reviewer maximally.

## 5 **1 General comments**

1. This comment relates to my major concern described above. Instead of basing the conclusions on error estimates and comparison with temperature profiles on manual evaluation of individual days, the authors should perform an objective and statistical analysis of all available days. This would e.g. make their recommendation about what SNR values should be used to obtain reliable mixing layer heights estimate more convincing. Instead of showing time series and time height sections for individual days (which makes the number of figures unnecessarily long in my opinion) they could show scatter plots, e.g. relate SNR to the error of the dissipation rate and calculate some statistical measures.

2. Sections 4 and 5 are quite long and confusing. It would be good to include some subsections, e.g. to distinguish the description of the method from the results in Sect. 5.

15 3. I recommend that the manuscript gets checked by a native speaker before publication.

We see no reason to include in this article the experimental dependences of the error of the dissipation rate estimate on the signal-to-noise ratio, since this issue was investigated earlier in the work by Banakh et al. (2017).

20 We have significantly revised sections 4 and 5. In particular, the text in these sections was shortened, Figures 4, 5, 7-13 were removed (figures were numbered in the original version of the manuscript), Figures 5-10 were added (figures are numbered in the revised manuscript).

The initial version of the manuscript was proofed by the MDPI English Editing Service and we have Certificate confirming that "the text has been checked for correct use of grammar and common technical terms, and edited to a level suitable for reporting research in a scholarly journal".

25

## **2 Specific comments**

1. p. 1, l. 18: "moisture, small gas constituents, pollutants, and heat"

Page 1, line 18: The text "and pollutants" has been replaced by "pollutants, and heat".

30 2. p. 1 l. 20-21: The definition of the ABL is fundamental knowledge and one of the classical text books such as Stull (1988) or Garratt (1994) should be cited for that.

The references "Stull (1988)" and "Garratt (1994)" have been added.

3. p. 1, l.24: Mixing layer height and ABL should be put into context.

35 We are not sure if we understand this reviewer comment correctly.

4. p. 1, l. 28: and dissipation rate

Page 2, line 1-2: The text "and turbulent energy dissipation rate  $\varepsilon(h)$ " has been added.

40 5. p. 2, l. 6-7: The recent study of Manninen et al. (2018) should be mentioned here as well.

The references "Manninen et al. (2018)" has been added.



6. p. 2, l. 7-8: What is meant by vertical scanning? What is the difference compared to vertical stare mode and conical scanning?

Page 2, line 10: The text "vertical scanning" has been replaced by "scanning in vertical plane".

5 7. p. 2, l. 17: Here and throughout the manuscript: The authors define abbreviations e.g.  $h_{\text{mix}}$  or  $\varepsilon$ , but do not use them consistently throughout the manuscript. Instead the sometimes use the long name or both. Once an abbreviation is introduced it should be used consistently.

We try to accommodate this remark.

10 8. p. 3, l. 3ff: The motivation and objectives of the study should be made clearer. What is new compared to previous work? How are the objectives addressed? What data are used?

We try to correct that, lines 6-12, page 3 of the revised manuscript.

9. p. 3, l. 23: Not clear what the scan number is. What is a scan? Full azimuth scan of 360 degree at a certain elevation angle?

15 Page 3, 4, lines 30, 1: The text "(full azimuth scan of 360 degree at a certain elevation angle)" has been added.

10. p. 4, l. 12: Isn't  $D_L$  still a function of  $R_k$ ?

Yes.

20

11. p. 4, l. 21: What is  $y$  in  $A(y)$ ?

Page 5, line 3: " $\Delta y_k = \Delta \theta R_k \cos \varphi$  ( $\Delta \theta$  is in radians)" has been added.

25 12. p. 4, l. 22ff: Thus,  $\bar{\sigma}_r^2$  depends on  $\varepsilon$ . How does that effect the comparison of mixing layer height determined from both quantities?

30 In equation (5), in addition to the instrumental error of radial velocity estimate, we take into account the averaging of the radial velocity over the probed volume. If the size (longitudinal or transverse) of this volume is less than the integral scale of turbulence, then the last term in Eq. (5) depends only on the dissipation rate. Without taking into account the averaging of the radial velocity over the probed volume, the variance estimate  $\bar{\sigma}_r^2$  is underestimated, and therefore, the estimate of the height of the mixing layer from  $\bar{\sigma}_r^2(h)$  will also be underestimated.

13. p. 5, l. 12-13: How strongly does this threshold vary in literature? Did the authors investigate how sensitive their results to the chosen threshold are?

35 We use the thresholds corresponding to the lower limit of moderate turbulence.

40 14. p. 5, l. 16ff: Why did the authors choose the period during wild fires for the analysis? What impact on the ABL conditions and their method do they expect? What are the site characteristics, i.e. terrain, surface conditions, ...? Are there other instruments deployed simultaneously? Later they mention surface flux measurements.

We use a Stream Line lidar with a rather low pulse energy and therefore, from measurements under normal conditions (at the place of the experiment, as a rule, a low aerosol concentration takes place), we can determine the parameters of wind turbulence up to an height of no more than 500 m. Since this is not enough to study the mixing layer height, we have chosen the period when the aerosol concentration (and therefore SNR) is high enough due to forest fires.

15. p. 5, l. 22: Why are the accumulation numbers used for the different elevation angles different?

We used the same accumulation number for the different elevation angles. But the accumulation numbers were different on different days.

10 Page 5, 6, lines 26, 1: "(until 12:30 22 July 2019)" and "(after 12:30 22 July 2019)" have been added.

Page 6, lines 5-8: The sentence "At the beginning of the experiment, we set the maximum range  $R_{k-1}$  equal to 2100 m (maximum measurement heights  $h_{k-1}$  of 1213 m and 1818 m at elevation angles of  $35.3^\circ$  and  $60^\circ$ , respectively), but after 12:30 on July 22, 2019) the maximum range  $R_{k-1}$  was increased to 3000 m ( $h_{k-1}$  of 1734 m and 2600 m at elevation angles of  $35.3^\circ$  and  $60^\circ$ , respectively)." has been added.

16. p. 6, l. 5ff: How is the threshold of -15 dB for SNR determined? How is the relative error of 30 % for turbulence parameters determined? How do clouds and fog affect the measurements in clear parts of the atmosphere? Please explain. Given that the whole time period encompasses 10 days only, it could be interesting to show 10-day time height sections of SNR and wind for the whole period to get an overview and information on the variety of atmospheric conditions.

From measurements on July 28 and 29 (the last two full days of the experiment), we found that above 500 m, the SNR did not exceed -15 dB (this is not a threshold, this is a fact).

Page 6, line 14: "~ 3 km" has been replaced by "2.6 km".

25 Page 6, lines 14-15: The sentence " Unfortunately, during the lidar measurements on July 26 and 27, there was a series of technical failures (rather lengthy), which made the obtained data unusable." has been added.

Page 6, lines 17-18: The text "(the method for calculating the error is described in papers by Banakh et al.(2017 and 2020))" has been added.

30 Page 6, lines 20-21: The sentence " Thus, we have data measured by the lidar for 6 days (from 20 to 25 July 2019) and which can be used to determine the heights of the mixing layer." has been added.

Figure 5 has been added.

17. p. 6, l. 12: What is meant by 'the elevation angle was alternated for  $\Delta\tau \approx 1.5s$ ? Until here, I was assuming that consecutive full azimuth scans were done one after the other at each elevation angle.

$\Delta\tau$  is the period of time during which the elevation angle changes from  $60^\circ$  to  $35.3^\circ$  or vice versa.

18. p. 6, l. 23: An objective comparison e.g. by calculating RMSE and correlation coefficient, would be more meaningful than stating that there are practically no differences.

40 If the difference is negligible, then what's the point of calculating the RMSE and the correlation coefficient. At least for this paper, this is not so important.

19. p. 7, l. 2-3: 'sufficiently high signal-to-noise ratio': how is that determined? What is the criterion to distinguish between sufficiently high and low SNR?  
Page 7, Line 16: The reference "(Banakh et al., 2017)" has been added. A description of the calculation of the error in estimating the dissipation rate depending on the SNR is given in this paper. We assume that the SNR is sufficiently high if the relative error in estimating the dissipation rate does not exceed 30%.
- 5 In Figures 2 and 3, the maximum heights have been changed from 1400 m to 1800 m (for the elevation angle of 60°) and from 1000 m to 1200 m (for the elevation angle of 35.3°). Page 7, line 12: " We replaced "1000 m" by "1200 m" and "1500 m" by "1800 m".
- 10
20. p. 7, l. 4ff: Like above an objective comparison by calculating RMSE and correlation coefficient would be more meaningful. Also, the comparison should be done for the whole period to make the result more meaningful.
- 15 The difference in the estimates of the dissipation rate obtained from measurements at different elevation angles is within the error calculated by the algorithm given in the paper of Banakh et al. (2017).
21. p. 7, l. 14-15: This is interesting. Do the authors have any hypothesis why TKE was similar while dissipation rate decreased with height?
- 20 This means that the integral scale of turbulence increases monotonically with height. Apparently, the kinetic energy of turbulence remains almost unchanged in the height interval from 60 m to 900 m due to strong convection at 13:00.
22. p. 7, l. 17-18, Fig. 5: The profiles plot do not really show any new information compared to the time height sections. What is the purpose of including them?
- 25 In the revised manuscript, we removed Figures 4 and 5.
23. p. 7, l. 22: Where does the threshold used for the radial velocity variance profiles come from? Is that based on other literature? Is it empirical?
- 30 For estimation of the MLH from the dissipation rate profiles we the threshold equal to  $10^{-4} \text{ m}^2/\text{s}^3$ . In the same time for estimation of the MLH from the radial velocity variance profiles we the threshold equal to  $0.1 \text{ m}^2/\text{s}^2$ . According to the calculation using Eq.(1) in the paper by Banakh and Smalikho (2019), at such threshold values ( $\varepsilon = 10^{-4} \text{ m}^2/\text{s}^3$  and  $\bar{\sigma}_r^2 = 0.1 \text{ m}^2/\text{s}^2$ ), the integral scale of turbulence  $L_v$  is approximately 200 m in the case of lidar measurement at elevation angle of 60°. Such  $L_v$  is quite
- 35 consistent with the results of our measurements in the daytime at heights of 200 - 600 m. Therefore, we used this threshold ( $0.1 \text{ m}^2/\text{s}^2$ ) for the radial velocity variance.
24. p. 7, l. 25: In case the values of  $\sigma_r$  or  $\varepsilon$  are smaller than their corresponding threshold, the mixing layer height is set to 60 m. Why not set it too missing? It is well possible that no mixing layer exists at
- 40 all.

In Figures 6 and 10, we removed the results obtained when the specified threshold exceeds the dissipation rate at an height of 60 m.

25. p. 7, l. 28: similar like to the comment about the sufficiently high SNR above. Which objective  
5 criteria is used to determine low quality data?

The data should not contain bad (false) radial velocity estimates. With the accumulation number of  
7500 laser shots, this will most likely occur if the signal-to-noise ratio is not lower than -16 dB  
(provided that the backscatter coefficient is statistically uniform at fixed height). We have determined  
10 this SNR threshold from numerical and atmospheric experiments. If the signal-to-noise ratio changes  
dramatically when the azimuth angle changes, reaching unacceptably low values, then the criterion for  
determining the suitability of the data becomes significantly more complicated.

26. p. 8, l. 3-4: An objective comparison between mixing layer height estimates for the different  
elevation angles could easily be done for all available days.

15 We think that measurements at an elevation angle of  $60^\circ$  are quite optimal and sufficient to obtain  
information about the height of the mixing layer, especially in the case of large height  $h_{\text{mix}}$  at which at  
an elevation angle of 35.3 degrees, the SNR can be unacceptably low.

27. p. 8, l. 8ff: What is the purpose of showing all these examples with plots of dissipation rate and SNR  
20 profiles? Like outlined in my major comment, an objective and statistical comparison would make the  
results more meaningful. The example plots for the individual days could e.g. be put in a supplemental  
or appendix.

We have removed figures 7-8 (this figures are numbered in the original version of the manuscript).

25 28. p. 8, l. 17-18: Can this change in SNR be related to a change in wind direction which could explain  
the enhanced advection of smog?

All day on July 20, 2019, north and northeastern winds were predominantly at the site of the lidar  
experiment (see figure 5c in the revised manuscript, azimuth angle of  $0^\circ$  corresponds to the direction  
from north to south). We know for sure that there was a forest fire in the northeast of the experiment site  
30 around the same time period. Because of this fire, all of Tomsk was in smog. We do not know when the  
fire started, but apparently after 18:00 the wind brought smog from the fire to the area of the  
experiment.

29. p. 8, l. 19-21: How reliable is  $\varepsilon$  calculated in the cloud layer? The mixing layer height is determined  
35 at the top of the layer with high SNR, i.e. somewhere in the lower part of the cloud. Depending on the  
cloud characteristics mixing may reach up much further. Thus, the estimated height does not necessarily  
agree with the true mixing layer height but is simply an affect of how deep the lidar beam penetrates  
into the cloud.

To estimate the dissipation rate, we used data satisfying the threshold for the signal-to-noise ratio. We  
40 did not specifically consider the issue of the accuracy of estimating the dissipation rate in the presence  
of clouds.

30. p. 9, l. 14: Please explain the difference between probing volume (30 m) and range gate length (18 m).

Our Stream Line lidar emits 170 ns pulses. The range gate length of 18 m corresponds to a 120 ns time window. Then, according to calculations using Eq. (2.34) in the monograph by Banakh and Smalikho (2013), the longitudinal dimension of the probing volume is 30 m.

31. p. 9, l. 17-18: The fact that cloud base and the detected mixing layer coincide does not confirm the correctness of the method. As seen in the examples, mixing layer heights are detected at the top of the layer with maximum SNR, i.e. in the lower part of the cloud. Mixing layer heights may be deeper. The correctness of the method can only be confirmed by comparing it to independent reliable measurements, such as radiosonde profiles.

We fully agree with this statement of the Reviewer. Unfortunately, we have no radiosonde profiles.

32. p. 9, l. 24: It would make it easier to understand how the relative error of TEDR is calculated, if the equation was given.

Page 9, line 11-12: " $(E_\varepsilon = [\langle (\hat{\varepsilon} / \varepsilon - 1)^2 \rangle]^{1/2} \times 100\%$ ,  $\hat{\varepsilon}$  is estimate and  $\varepsilon$  is true dissipation rate)" has been added.

33. p. 9, l. 26: Why only look at the relative error at mixing layer height? What is the time height section of this error?

Indeed, we obtain the height-time distributions of the error of the radial velocity estimate and the error of the dissipation rate from the data of the atmospheric experiment, but we consider it inappropriate to present such distributions in this paper. Since the accuracy of estimating the MLH is mainly influenced by the error in estimating the dissipation rate at this height, Figure 7 (in the revised manuscript) shows the time series  $E_\varepsilon(h_{\text{mix}}(t_n))$ .

34. p. 9, l. 27ff, Fig. 11: In my opinion, Fig. 11 is not ideal and the explanation why the error is high or low could be much easier to follow if a scatter plot between the error and SNR was shown.

According to Figures 8a and 8c (in the revised manuscript), it is possible to obtain the dependence of the relative error in the dissipation rate estimate on the SNR. However, it should be borne in mind that this relative error  $E_\varepsilon$  essentially depends on the magnitude of the dissipation rate  $\varepsilon$ , that is,  $E_\varepsilon$  is a function of SNR and  $\varepsilon$ . The paper by Banakh et al. (2017) is devoted to the study of the relative error  $E_\varepsilon$  depending on the SNR and  $\varepsilon$ .

35. p. 10, l. 21ff: What is the purpose of the series of closed numerical experiments? It is not clear how they are done. What are the preset values of the mixing layer height?

A detailed description of the algorithm for numerical simulation of random realizations for estimating the profiles of the dissipation rate is given in the article by Smalikho and Banakh (2013). It is not the mixing layer height that is important here, but the vertical gradient of the dissipation rate. The main goal of the closed experiments is to estimate the correlation coefficient  $C_\xi(l\Delta h)$ , which is then used in the

numerical simulation of random realizations of vertical profiles of the dissipation rate  $\hat{\epsilon}(h_k)$  according to Eq.(6).

36. p. 11, l. 1ff: What is the experimental error? On what assumption is the threshold of 30 % for the relative error based?

Page 10. line 25: "experimental" has been deleted and " using data of atmospheric experiment " has been added. The calculation of the relative error  $E_\epsilon(h_k)$  is carried out with the use Eq.(6) in paper by Banakh et al. (2017). This equation is valid only under the condition  $E_\epsilon(h_k) < 30\%$ .

37. p. 11, l. 14ff: While reading this paragraph I was wondering how the calculations are done. This information is given in the following paragraph and I suggest changing the order.

This paragraph has been removed.

38. p. 11, l. 25: What do the random realizations of TEDR look like? How much do they differ from the original profiles? It could be interesting to show some profiles.

Figures 8 and 9 have been added.

Page 11, lines 11-22: The text " Let us consider an example ... = 69 m. " has been added.

39. p. 12, l. 4ff: the error for mixing layer height obtained with the described method is very small. A discussion of other uncertainties related to the mixing layer height, e.g. the sensitivity to the used threshold, should be included. To really assess how correct the determined mixing layer heights are, comparison with independent measurements such as radiosoundings would be necessary. It would be interesting to see if the mixing layer height determined from TEDR would agree with mixing layer heights determined from other instruments (Emeis et al., 2008) within the uncertainty range.

In section 5, the last two paragraphs are replaced by the text " Figure 10 shows ... with SNR of at least -16 dB. " (page 11, lines 23-28; page 12, lines 1-4).

In this experiment, we used only a Stream Line lidar and a temperature profiler (microwave radiometer). We hope that in future experiments we will be able to additionally use other technical means of measurement, including radiosounding.

40. p. 12, l. 22: The Richardson number describes if turbulence can develop in a stably stratified atmosphere (e.g. Stull, 1988). The static stability is described by the temperature gradient.

The Reviewer is right absolutely. This is a slip of a pen. Fixed. Line 7, page 12 of the revised manuscript.

41. p. 13, l. 4ff: It should be mentioned in the beginning that an additional data set from a period in 2020 is used. Also, if data from a microwave radiometer are used much more information on this instrument needs to be given. The temperature profile retrieved from the passive instrument are prone to uncertainties and errors and information on its accuracy and the used retrievals should be given.

Microwave radiometers often struggle to resolve elevated inversion at the top of the ABL and thus the gradient Richardson number obtained from these instruments have to be used with care and it should

not be taken as granted that they can correctly detect the inversion at the top of the ABL and that they can be used to validate the mixing layer height detected from  $\varepsilon$ .

We understand that this device measures temperature indirectly and some errors in determining the temperature can arise. We did not study this issue specially. The phrases on page 12, Lines 17-19 of the revised manuscript are added.

42. p. 13, l. 22ff: Like above, a statistical objective analysis of the whole period should be conducted and the conclusion that the mixing layer height derived from  $\varepsilon$  agrees well with the gradient Richardson number using a threshold of 0.5 should be based on the whole data set and not just on a single example day.

Text on 13 and 14 pages of the initial version of the manuscript is changed. We extended the experimental data which are considered and analyzed. (Pages 13-14 of the revised manuscript.)

43. p. 14, l. 5: A mixing layer height of several hundred meters during the night must be shear driven. A discussion of the physical processes causing the mixing layer is missing and should be added to the pure description of the profiles.

The phrases on page 14, Lines 11-14 of the revised manuscript are added.

44. p. 14, l. 20: Second period in 2020 should be mentioned.

Fixed, page 15, Lines 16-17 of the revised manuscript.

45. p. 15, l. 13-14: It is not clear to me where the vertical gradient of TEDR is considered in the error estimate.

In calculating the error MLH estimate, we use in equation (6) not the vertical gradient  $\gamma$  of the dissipation rate, but the vertical profile of the dissipation rate. We suppressed different values of the vertical gradient  $\gamma$  only in numerical experiments. Obviously, the slower the dissipation rate decreases with height, the smaller the vertical gradient  $\gamma$  and, as shown by numerical experiments, the larger the error of MLH estimate.

46. p. 15, l. 14: The result 'SNR should be no less than -16 dB' is not clear to me. On what analysis is that based?

The data should not contain bad (false) radial velocity estimates. With the accumulation number of 7500 laser shots, this will most likely occur if the signal-to-noise ratio is not lower than -16 dB (provided that the backscatter coefficient is statistically uniform at fixed height). We have determined this SNR threshold from numerical and atmospheric experiments.

47. p. 15, l. 16ff: A good way of showing this could be by plotting the error of the mixing layer height over  $\varepsilon$ .

The errors of estimation of the MLH in the experiment in July 2019 are demonstrated in Fig. 10

## References

- Emeis, S., Schafer, K., and Munkel, C.: Surface-based remote sensing of the mixing-layer height - a review, *Meteorologische Zeitschrift*, 17, No. 517, 621-630, doi:10.1127/0941-2948/2008/0312, 2008.
- Garratt, J. R.: *The atmospheric boundary layer*, Cambridge atmospheric and space science series, Cambridge University Press, 316 pp, Cambridge, 1994.
- 5 Manninen, A., Marke, T., Tuononen, M., and O'Connor, E.: Atmospheric boundary layer classification with Doppler lidar, *J. Geophys. Res.*, 123, 8172-8189, doi:10.1029/2017JD028169, 2018.
- Stull, R. B.: *An introduction to boundary layer meteorology*, Kluwer Academic Publishers, 666 pp, Dordrecht, The Netherlands, 1988.
- Vakkari, V., O'Connor, E., Nisantzi, A., Mamouri, R., and Hadjimitsis, D.: Low-level mixing height  
10 detection in coastal locations with a scanning Doppler lidar, *Atmos. Meas. Tech.*, 8, 1875-1885, doi:10.5194/amt-8-1875-2015, 2015.
